# 1 **High-throughput microcircuit analysis of individual human brains** 2 **through next-generation multineuron patch-clamp**

3 Yangfan Peng<sup>1,2</sup>, Franz X. Mittermaier<sup>1</sup>, Henrike Planert<sup>1</sup>, Ulf C. Schneider<sup>3</sup>, Henrik Alle<sup>1</sup>, Jörg  
4 R.P. Geiger<sup>1</sup>

5 *<sup>1</sup>Institute of Neurophysiology, Charité – Universitätsmedizin Berlin, Germany*

6 *<sup>2</sup>Department of Neurology, Charité – Universitätsmedizin Berlin, Germany*

7 *<sup>3</sup>Department of Neurosurgery, Charité – Universitätsmedizin Berlin, Germany*

## 8 **Abstract**

9 Comparing neuronal microcircuits across different brain regions, species and individuals can  
10 reveal common and divergent principles of network computation. Simultaneous patch-clamp  
11 recordings from multiple neurons offer the highest temporal and subthreshold resolution to  
12 analyse local synaptic connectivity. However, its establishment is technically complex and the  
13 experimental performance is limited – by high failure rates, long experimental times and small  
14 sample sizes. We introduce an in-vitro multipatch setup with an automated pipette pressure  
15 and cleaning system facilitating recordings of up to 10 neurons simultaneously and sequential  
16 patching of additional neurons. We present hardware and software solutions that increase the  
17 usability, speed and data throughput of multipatch experiments which allowed probing of 150  
18 synaptic connections between 17 neurons in one human cortical slice and screening of over  
19 600 connections in tissue from a single patient. This method will facilitate the systematic  
20 analysis of microcircuits and allow unprecedented comparisons at the level of individuals.

## 21 **Introduction**

22 **Neuronal microcircuits represent the backbone for computations of the brain.** While it is  
23 well established that information flow between the cortical layers is rather stereotypical  
24 (Douglas and Martin, 2004), the intralaminar connectivity between different classes of neurons  
25 is more complicated and heterogeneous across brain regions (Jiang et al., 2015; Peng et al.,  
26 2017; Song et al., 2005). Furthermore, it remains as yet unclear how these observed  
27 microcircuit topologies generalize across species, or whether and how inter-individual  
28 differences are represented at the level of neuronal microcircuits.

1 **Cortical resections from epilepsy or tumor patients represent a unique opportunity to**  
2 **analyse the human neuronal microcircuit.** While specific cellular and synaptic properties in  
3 the human central nervous system have been described (Kalmbach et al., 2018; Molnár et al.,  
4 2016; Szegedi et al., 2016), distinctive features on the microcircuit level have yet to be resolved  
5 (Seeman et al., 2018). Availability of human brain tissue is scarce making it, at present,  
6 necessary to pool data across patients. This is problematic due to the high diversity in humans,  
7 in contrast to laboratory animals. Therefore, it is essential that we develop more efficient ways  
8 to generate large sample sizes from single patients. Apart from that, in non-human studies,  
9 increasing the data yield from individual animals would also efficiently promote the ethical  
10 principle to replace, reduce and refine animal experiments (Russell et al., 1959).

11 **To dissect microcircuits, multiple whole-cell patch-clamp (multipatch) recordings still**  
12 **represent the gold standard method compared to various other approaches** (Hochbaum  
13 et al., 2014; Packer et al., 2014). This method can reliably detect unitary excitatory and  
14 inhibitory synaptic connections due to its sub-millisecond and subthreshold resolution (Geiger  
15 et al., 1997). In addition, it allows for detailed electrophysiological and morphological  
16 characterization of recorded neurons and can be used across species without the need for  
17 genetic modifications in contrast to optogenetics or calcium imaging (Markram et al., 2004).  
18 These conditions enable the investigation of connection probabilities, amplitude distributions  
19 and higher order network statistics incorporating distance-dependencies (Song et al., 2005;  
20 Thomson and Lamy, 2007). Increasing the number of simultaneously recorded neurons can  
21 increase the number of probed synaptic connections considerably, generating larger sample  
22 sizes from fewer experiments.

23 **However, multipatch setups increase the complexity and time of experiments,**  
24 **necessitating automatisation.** Various groups were able to increase the number of  
25 simultaneous recordings (Guzman et al., 2016; Jiang et al., 2015; Peng et al., 2017; Perin et  
26 al., 2011; Perin and Markram, 2013; Wang et al., 2015)), but the operation of multiple  
27 manipulators is challenging. To address this, several approaches have been reported that  
28 automate the patch-clamp process, utilizing automated pressure control systems and

1 algorithms for manipulator movements guided by visual or electrical signals (Kodandaramaiah  
2 et al., 2018, 2016, 2012; Perin and Markram, 2013; Wu et al., 2016). While simultaneous  
3 recordings of up to 4 neurons are becoming increasingly popular, the use of more than 8  
4 manipulators on a setup is currently limited to only a few labs, missing out on the opportunity  
5 to maximize the potential of this method.

6 **Cleaning pipettes for immediate reuse increases the size of recorded clusters of**  
7 **neurons and enables a more complete view of the microcircuit.** The maximum number of  
8 simultaneously recorded neurons is highly limited by the spatial constraints imposed by the  
9 manipulators. Furthermore, the success rate of a whole-cell recording depends on mechanical  
10 interference, deterioration of recording quality during a prolonged experimental time and the  
11 tissue quality. These factors are aggravated when the number of pipettes is increased.  
12 Cleaning pipettes for immediate reuse enables recording of additional neurons in one  
13 experimental session without manual replacement. This technique has already been  
14 implemented for automated patch-clamp of single neurons in vivo (Kodandaramaiah et al.,  
15 2018; Kolb et al., 2016). Applying pipette cleaning to in-vitro multipatch setups has the potential  
16 to increase the number of pipettes with successful recordings and therefore the experimental  
17 yield. Sequential recordings from multiple cells using the same pipette would also overcome  
18 the limitation on maximum cluster size given by the number of manipulators in use. This will  
19 provide a more complete view of the microcircuit enabling the analysis of more complex  
20 network motifs and higher degree distributions (Perin et al., 2011; Song et al., 2005; Vegué et  
21 al., 2017).

22 **In this report, we introduce an in-vitro multipatch approach with an automated pipette**  
23 **pressure and cleaning system strongly facilitating recordings of up to 10 neurons**  
24 **simultaneously.** We show that this approach and further optimizations increase the rate of  
25 complete clusters, decrease experimental time and enable sequential patching of additional  
26 neurons. We demonstrate that probing of up to 600 synaptic connections in human brain slices  
27 in one day with two setups is possible allowing comparisons of microcircuits between individual  
28 patients.

## 1 Methods

2 We will first provide technical instructions for establishing a multipatch setup and how to  
3 address specific challenges when using up to 10 manipulators. We then describe an  
4 automated pressure device for multiple pipettes and how to implement a pipette cleaning  
5 protocol. Finally, we show that these technical improvements enable a higher data yield  
6 allowing extensive connectivity analysis in slices of human cortical resections and higher  
7 degree analysis of individual cells far exceeding the capacity of conventional multipatch  
8 setups.

## 9 Spatial arrangement of hardware

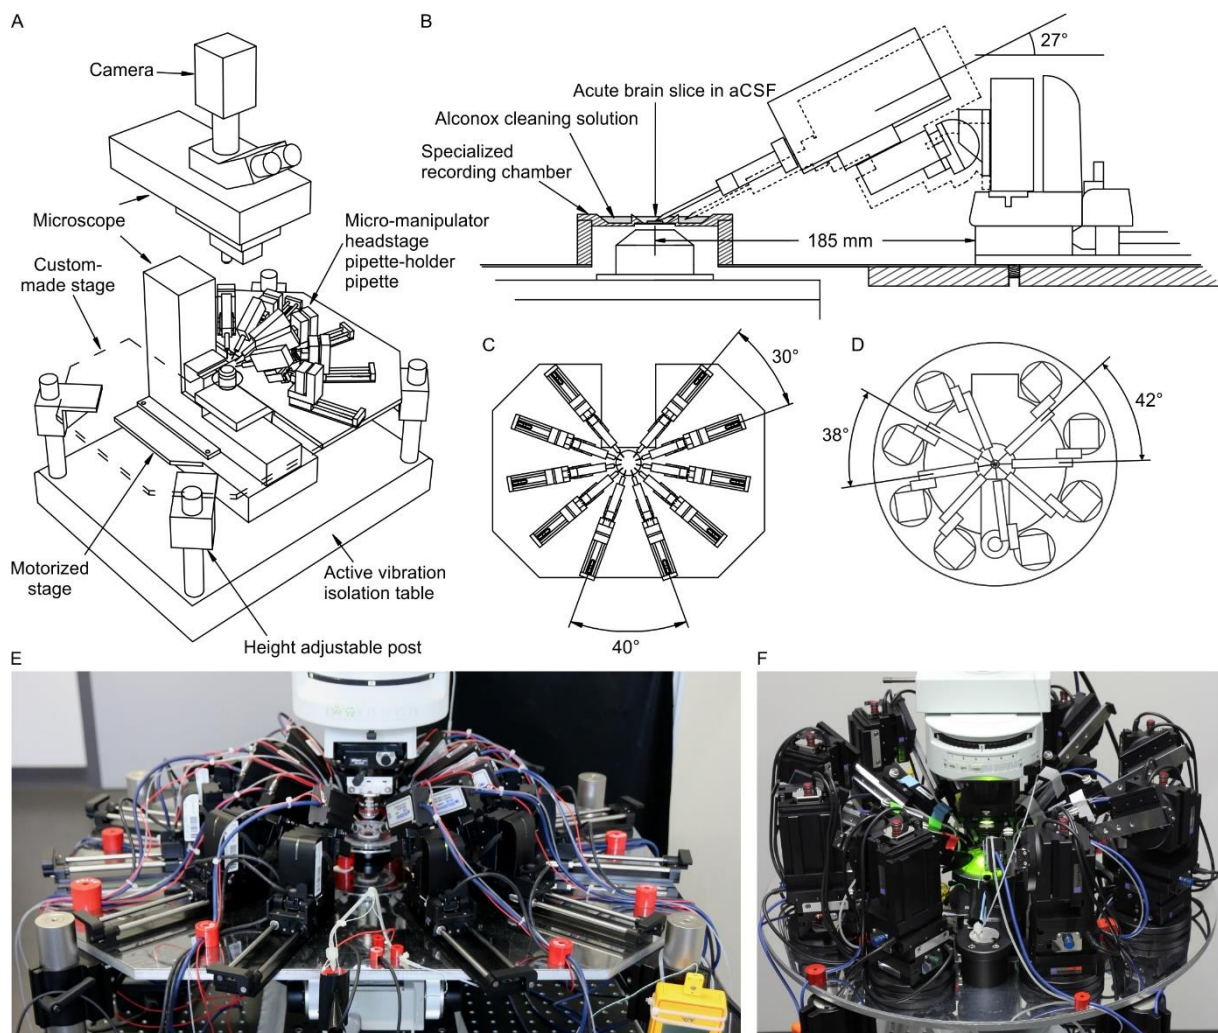

10 **Figure 1: Multipatch setups.** (A) Overview of essential components of a 10-manipulator setup  
11 with Sensapex micromanipulators. (B) Side view depicting the spatial arrangement of a  
12 manipulator including headstage and pipette relative to the recording chamber which is elevated  
13 above the condenser. The dashed outline shows the manipulator with pipette tip immersed in the  
14 cleaning solution. (C) Top view of 10 Sensapex manipulators with headstages and their angles to  
15 each other on the custom-made stage. (D) Top view of 8 Scientifica PatchStar manipulators  
16 with headstages and their angles to each other on a custom-made ring-shaped stage. (E) Photograph  
17 of the 10-manipulator setup. (F) Photograph of the 8-manipulator setup.



1 **Expanding a setup from a single or dual patch-clamp configuration to one with more**  
2 **patch pipettes is primarily an issue of spatial arrangement of the micromanipulators.**

3 This upscaling of multipatch setups has been accomplished with manipulator systems from  
4 different commercial manufacturers such as Luigs & Neumann (Guzman et al., 2016; Jiang et  
5 al., 2015; Wang et al., 2015; Winterer et al., 2017) and Scientifica (Cossell et al., 2015; Peng  
6 et al., 2017). Crucial to any multipatch setup is the fine spatial arrangement of the manipulators  
7 which we found most easy to address by using a custom stage even though there are also  
8 commercial solutions available. We arranged ten Sensapex uMp-Micromanipulators on a  
9 setup with a Nikon Eclipse FN1 microscope using a custom-made stage which was fabricated  
10 by a common metal workshop (Fig. 1A-C). We also successfully established a setup with 8  
11 Scientifica PatchStar manipulators on a custom-made stage with a Scientifica SliceScope  
12 microscope (Fig. 1D, (Peng et al., 2017)). Our custom stages consist of a 10 mm aluminium  
13 sheet for stability glued to a 1 mm stainless steel sheet to create a ferromagnetic surface for  
14 cable routing using magnets. The stage is supported by platforms mounted onto poles, which  
15 enable flexible height adjustment. For exact dimensions of the stage, see supplementary  
16 material. The remaining perfusion system and hardware including electronic components  
17 resemble other typical patch-clamp setups and are listed in table 1. To operate 10 patch-clamp  
18 amplifiers within one digitizer that is also commercially available (Power1401-3A from  
19 Cambridge Electronic Design), we needed to increase the number of digital-to-analogue  
20 converter (DAC) channels from 8 to 10. We achieved this by a simple routing device that is  
21 capable of switching between channels enabling four headstages to receive stimulation from  
22 only two DAC outputs, see supplementary material for details of the routing device.

23 **Another crucial aspect is the distance and angle of the pipettes to the recording**  
24 **chamber** (Fig. 1B). A shallow approach angle increases the range of motion in the x-axis which  
25 is important to reach both the centre of the recording well and the outside well containing the  
26 cleaning solution. However, the angle needs to be sufficiently steep to allow the pipette tip to  
27 reach the slice surface in the z-axis while avoiding touching the wall of the centre well. We  
28 found that 27° to be optimal for our custom-made recording chamber, which is positioned on

1 an elevated platform. To increase stability, the distance of the manipulator to the recording  
2 chamber should be minimized. At the same time, sufficient space between the headstages  
3 must be maintained to allow the necessary range of motion.

4 **Table 1: Hardware components of 10-manipulator setup**

| Hardware                         | Manufacturer                | Model                                                     |
|----------------------------------|-----------------------------|-----------------------------------------------------------|
| 5 dual patch-clamp amplifiers    | Molecular Devices           | MultiClamp 700B<br>CV-7B headstage                        |
| Data acquisition system          | Cambridge Electronic Design | Power1401-3A<br>+ Signal Expansion (2701-5)               |
| 10 Micromanipulators             | Sensapex                    | u-Mp Micromanipulator                                     |
| Microscope                       | Nikon                       | Eclipse FN1                                               |
| Motorized stage for microscope   | Scientifica                 | UMS-2550P for x-/y-axis<br>Stepper motor for z-axis drive |
| Camera                           | Hamamatsu                   | Orca-Flash 4.0                                            |
| LED infrared light source        | Thorlabs                    | M780L3                                                    |
| 4 height adjustable poles        | Thorlabs                    | P250/M, PB1, C1515/M                                      |
| Active vibration isolation table | Accurion                    | Halcyonics_i4large                                        |
| Peristaltic pump                 | Gilson                      | Minipuls 3                                                |
| Thermostat                       | Multichannel systems        | TC01                                                      |
| Stage for manipulators           | Custom-made                 | Design in supplement                                      |
| Recording chamber                | Custom-made                 | Design in supplement                                      |

5 **Pressure control system**

6 **We adapted the use of solenoid valves and pressure regulators for automated in-vivo**  
7 **patch-clamp to our in-vitro multipatch approach** (Kodandaramaiah et al., 2016).  
8 Throughout the process of patching a cell, variable pressure levels are required.  
9 Conventionally, this is achieved with pressurized chambers, a three-way valve and a  
10 mouthpiece or a syringe. Since control of individual pipettes using manual pressure is not  
11 feasible for multiple pipettes, an automated pressure system is needed. A previous report has  
12 demonstrated an electrically controlled pressure system for a multipatch setup (Perin and  
13 Markram, 2013). Kodandaramaiah et al. have furthermore introduced the Autopatcher, an  
14 automatic pressure device combined with a pipette movement algorithm, for automated in-vivo

1 patch-clamp (Kodandaramaiah et al., 2016, 2012). This latter device has also been developed  
 2 for multi-neuron in-vivo recordings with 4 pipettes (Kodandaramaiah et al., 2018). We adapted  
 3 the described automatic pressure system to our setup and scaled it up to 10 pipettes, with  
 4 different components that are cost-efficient and widely available. It also enables the application  
 5 of multiple pressure levels to individual pipettes simultaneously. A detailed component list with  
 6 price estimates and construction manual with illustrated step-by-step instructions for the  
 7 automated pressure system is attached in the supplementary material. It can be built within a  
 8 week with basic electrical equipment and does not require extensive technical skills. We  
 9 believe that the easy-to-build modular construction approach is useful for labs that want to  
 10 implement this tool and adjust it to their needs.

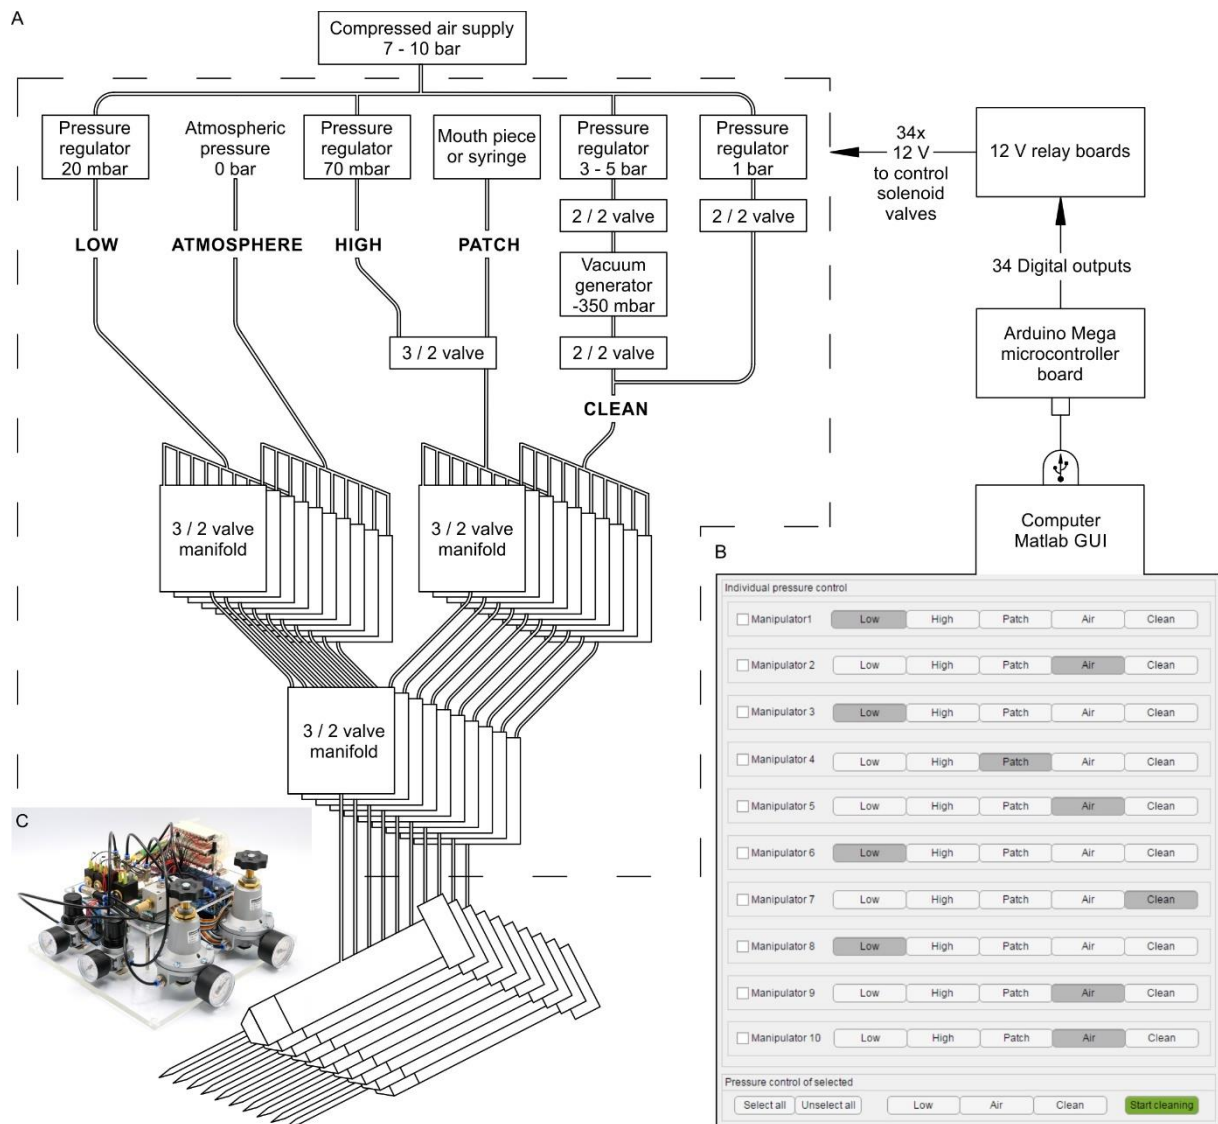

11 **Figure 2: Automated pressure system.** (A) Tubing scheme between the different pneumatic  
 12 components. Top row depicts pressure regulators and their set pressure for each path. 2/2 valves  
 13 are solenoid valves with two ports and two positions (open or closed). 3/2 valves are miniature  
 14

1 solenoid valves with three ports and can switch between two positions connecting either inlet to  
2 one outlet. For further details, see the supplementary document. (B) Screenshot of Matlab GUI  
3 controlling the pressure system. It communicates with an Arduino microcontroller board which in  
4 turn has digital outputs connecting onto a relay board. For further details on GUI and wiring  
5 scheme see the supplementary document. (C) Photograph of an assembled pressure system.

6 **Multiple pressure regulators were connected to the compressed air outlet to generate**  
7 **different adjustable pressure levels to the pipettes** (Fig. 2A). We set one pressure regulator  
8 at 20 mbar (LOW) for continuous outflow of pipette solution during the idle state in the bath to  
9 prevent clogging of the tip. We apply 70 mbar (HIGH) for moving through the slice to approach  
10 the cell. Since HIGH pressure is only applied to the active pipette and will always be followed  
11 by the pressure of a mouth piece or syringe (PATCH), these two pressure levels share one  
12 output. In the PATCH mode we wait for the formation of the gigaseal, apply light suction when  
13 needed and apply a stronger suction to break into the cell. We believe that this is a crucial part  
14 of the patching process which needs fine manual adjustment regarding the duration and  
15 strength of suction to achieve maximum success rate (up to 88% on 6-manipulator setup, see  
16 results on performance below) while reports on fully automated in-vitro patch-clamp algorithms  
17 have reported a relatively low success rate of 43% using a single pipette (Wu and Chubykin,  
18 2017). After successful establishment of a whole-cell configuration, the pressure in the pipette  
19 will be switched to atmospheric pressure (ATMOSPHERE). The fifth pressure channel is  
20 implemented for the pipette cleaning process described below (CLEAN).

21 By arranging 3 miniature solenoid valves in a tree structure for each pipette, we are able to  
22 direct these different pressure levels to each pipette individually (Fig. 2A). The solenoid valves  
23 are electrically operated using commercially available 12 V relays which are controlled by the  
24 digital outputs of an Arduino Mega microcontroller board. To control the pressure system  
25 through the Arduino board we developed a graphical user interface in MATLAB (Fig 2B, further  
26 instructions and link to code repository provided in supplementary material). This open-source  
27 and affordable pressure system is applicable to any other patch-clamp setup. It can reduce  
28 experimental errors, increase the experimental speed and help the experimenter to  
29 concentrate on the other tasks which are essential for successful operation of a multipatch  
30 setup.

## 1 Cleaning system

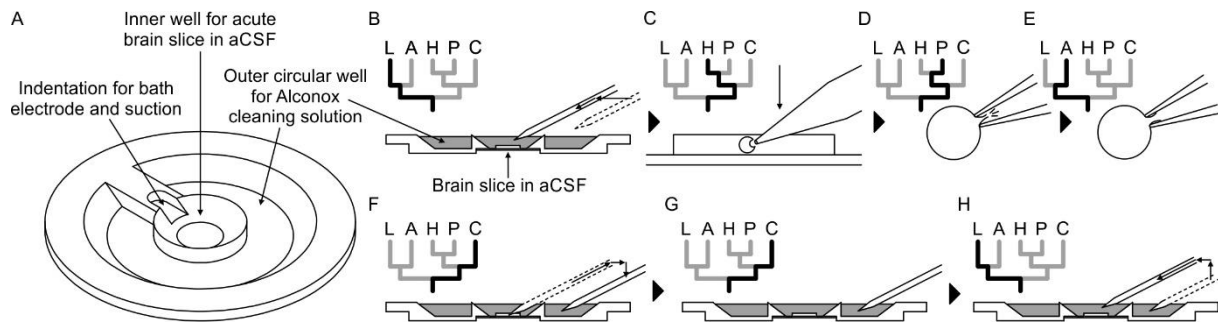

2  
3 **Figure 3: Pipette cleaning protocol.** (A) Design of custom-made recording chamber with one  
4 centre well for the brain slice and recording solution and another circular outer well for the  
5 cleaning solution, see construction design in supplementary document. (B-H) Experimental steps  
6 for pipette cleaning. Tree diagrams on the top left depict the configuration of the pressure system  
7 with the following pressure levels: LOW, ATMOSPHERE, HIGH, PATCH, CLEAN. (B) Pipettes are  
8 moved into the recording solution with LOW pressure. (C) Cells are approached with HIGH  
9 pressure. (D) Formation of gigaseal and membrane rupture with pressures applied through the  
10 PATCH channel with either mouth piece or syringe. (E) Cells are kept at ATMOSPHERE  
11 pressure after successful patch. (F) Pipettes are moved into the cleaning solution and switched to CLEAN  
12 pressure. (G) Cleaning pressure sequence is applied in the outer well. (H) Pipettes are moved  
13 back into the recording solution above the slice and switched to LOW pressure.

14 **We adopted a pipette cleaning protocol to the in-vitro multipatch setup which enables**

15 **immediate retry after a failed patch attempt and recording of additional neurons through**

16 **sequential patching.** A recent study has shown that dipping the tip of a patch pipette in a

17 detergent solution (Alconox) and applying a sequence of pressure and suction could clean a

18 pipette for immediate reuse (Kolb et al., 2016). In this study, they showed that more than ten

19 successful “repatches” using the same patch pipette were possible with no change in the

20 electrophysiological properties of the cells were observed. We implemented this protocol to

21 our multipatch approach, because it could increase the success rate of establishing good

22 recordings. To incorporate a well for the detergent solution, we constructed a custom recording

23 chamber with an outer circular well which is separated to the inner recording well (Fig 3A, see

24 supplementary material for detailed construction designs). With the optimal angle and

25 positioning of the manipulators (Fig. 1B), all pipettes can access the brain slice and the

26 cleaning solution without mechanical interference.

27 **To clean the pipettes automatically, both the sequence of pipette pressure and**

28 **manipulator movement need to be automated und coordinated.** We programmed the

29 movements of our Sensapex and Scientifica micromanipulators in Matlab and integrated them

30 into the GUI of the pressure system. We recommend custom development of these



1 manipulator movements due to the specific parameters of each setup. Example code and key  
2 aspects of manipulator programming can be found in the Github repository (link provided in  
3 supplementary material). Using the CLEAN channel, the automated pressure system is now  
4 able to apply positive and negative pressure as described in the protocol (Kolb et al., 2016).  
5 We used a pressure regulator connected to the compressed air outlet to generate 1 bar for  
6 expulsion and another pressure regulator coupled with a vacuum ejector to generate -350  
7 mbar for suction at the pipette tip (Fig 2A). The pressure regulators and the vacuum generator  
8 are connected to downstream solenoid valves which control and alternate the pressure.

9 **Incorporating automated manipulator movements, pressure control and the cleaning**  
10 **protocol make the experimental steps easier and faster (Video 1).** Pipettes are  
11 sequentially moved into the recording well to their dedicated position in the field of view  
12 approximately 2 mm above the slice. Small manual adjustments under visual control are  
13 necessary for each pipette due to variation in pipette length. The pipette pressure is set to  
14 LOW (20 mbar) to avoid clogging of the tip (Fig. 3B). To speed up this process and avoid  
15 collisions, we semi-automated it by developing a pipette finding algorithm which we discuss  
16 further below. After positioning of all pipettes around approximately 200  $\mu\text{m}$  above the slice,  
17 cells are approached and patched sequentially under visual guidance. To prevent  
18 contamination of the pipette tip while moving through the slice, the HIGH pressure (70 mbar)  
19 is applied to the pipette (Fig. 3C). When a dimple on the cell surface can be seen, the pressure  
20 is released by switching to the PATCH channel. Manual application of suction either through a  
21 mouth piece or manually through a syringe is then needed to obtain a good seal and to break  
22 through the membrane to establish the whole-cell configuration (Fig. 3D). Pipettes with  
23 successfully patched cells are switched to atmospheric pressure (ATMOSPHERE, Fig. 3E). If  
24 the sealing process is unsuccessful or the whole-cell recording deteriorates, even multiple  
25 pipettes can now be cleaned simultaneously through an automated process. The cleaning  
26 process starts with the automated retraction of the pipettes to a position outside of the chamber  
27 above the outer well (Fig. 3F). They are then lowered into the detergent solution (Fig. 3G).  
28 After the pipette pressure is switched to the CLEAN channel, suction (-350 mbar, 1 s) and

1 pressure (1 bar, 1 s) are alternatively applied for 5 cycles, followed by a long expulsion  
2 sequence (1 bar, 10 s). For the next step, the pipettes are moved to the outer rim of the  
3 recording well into the recording solution for a final expulsion sequence (1 bar, 10 s) and are  
4 then moved to the initial position above the slice while the pressure is set to LOW (Fig. 3H).

5 **The final expulsion sequence does not require additional wells containing aCSF as**  
6 **compared to the original protocol (Kolb et al., 2016).** By omitting a second well containing  
7 aCSF we ensured access of all pipettes to the cleaning solution. However, the final expelling  
8 sequence could introduce traces of Alconox solution into the extracellular recording solution.  
9 Alconox contains 10-20% sodium linear alkylbenzene sulfonate (LAS), which affects Glycin-,  
10 GABA<sub>A</sub>- and GluR6-mediated currents at concentrations around 0.001% (Machu et al., 1998).  
11 Since it has already been shown that no significant amount of LAS could be detected in the  
12 pipette solution after the cleaning cycles (Kolb et al., 2016), the remaining potential source of  
13 contamination is residual detergent adhering to the outside surface of the pipette tip. A volume  
14 of at least 25 µl Alconox would be needed to reach the critical LAS concentration of 0.001% in  
15 the extracellular solution, assuming a recording bath volume of 1 ml and a LAS concentration  
16 of 20% in the 2% Alconox solution. We estimate the adherent Alconox solution on a pipette tip  
17 to be less than 0.2 µl considering that the total volume of intracellular solution inside a pipette  
18 is usually less than 15 µl. We thus believe that the potential impact on the synaptic connectivity  
19 and electrophysiological properties is negligible considering this high degree of dilution and  
20 the continuous flow of extracellular solution at more than 2 ml/min. Likewise, we found no  
21 difference in recording quality or electrophysiological properties between pipettes at first use  
22 and after cleaning.

23 The entire cleaning process takes approximately 1 minute and can be executed for multiple  
24 pipettes at the same time and simultaneously to a patch attempt. Therefore, pipettes failing to  
25 establish a good recording can be subject to immediate cleaning and reuse. This greatly  
26 increases the success rate of obtaining recordings and thus the yield of a single experiment.  
27 Furthermore, after recording of a full cluster, multiple pipettes can be cleaned, and additional  
28 cells can be patched and included in the analysis. We also believe that the possibility to

1 repetitively perform patch attempts without manual replacement of the pipettes increases the  
2 speed of learning and performance of novel experimentalists, thus lowering the barrier to  
3 establish multipatch setups.

#### 4 **Preparation of pipettes**

5 **With increasing number of pipettes, preparations take up significant experimental time**  
6 **which we addressed by additional optimizations such as a multi-pipette filling device**  
7 **and semiautomated positioning of pipettes.** Before the pipettes are positioned above the  
8 slice and are ready for patching, multiple time consuming preparatory steps are necessary,  
9 such as pipette pulling, filling and positioning. We therefore designed a device which can hold  
10 and fill multiple pipettes at the same time (see supplementary material for construction  
11 designs). It uses the prefill approach to suck intracellular solution through the tip. Backfilling  
12 using a syringe might still be necessary when prefilling is not sufficient. This approach reduced  
13 the time to fill and mount all pipettes to 11-13 minutes, while the time of during prefilling can  
14 be used for other preparations (Fig 4C). We also optimized the procedure to find and position  
15 the pipettes in a new region of interest (Video 2). Manipulator coordinates were matched to the  
16 vmicroscope coordinates using a rotation matrix and anchored to a common reference point  
17 (Perin and Markram, 2013). A semi-automated algorithm determines optimal positions of each  
18 pipette and all pipettes are moved to roughly 200  $\mu\text{m}$  above the slice. The specific steps are  
19 explained in detail in the supplementary material. This semi-automated approach reduces the  
20 risk of breaking pipette tips and the time needed to complete pipette positioning to 7-9 minutes  
21 (Fig. 4C).

22

23

24

25

## 1 Results

### 2 Performances achievable with multipatch setups

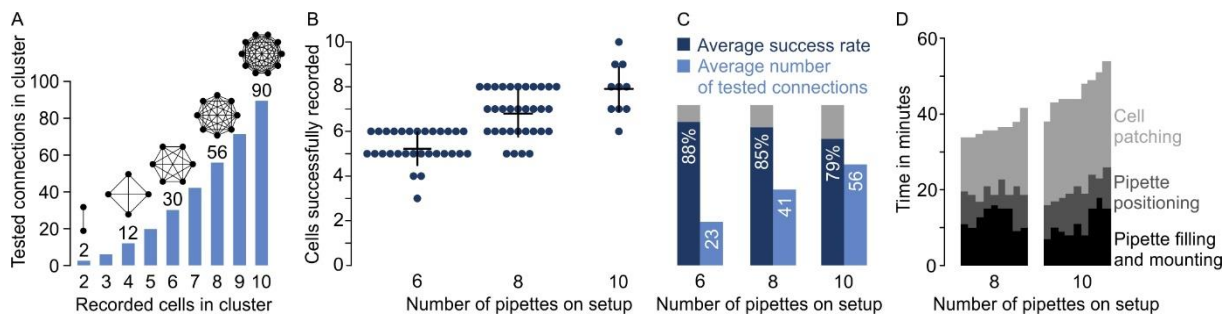

3  
4 **Figure 4: Performances on multipatch setups.** (A) Bar graphs depicting maximum number of  
5 testable connections for increasing number of simultaneously recorded cells. (B) Dot plot of  
6 number of simultaneously recorded cells from rodent brain slice experiments using different  
7 multipatch setups. Black crosses indicate mean and standard deviation. Source data in Figure 5-  
8 source data. (C) Bar graphs of performance parameters derived from B. Average success rate  
9 represents the average size of recorded clusters in relation to the number of available pipettes  
10 on each setup. Average number of tested connections are derived from the number of tested  
11 connections from each experiment. Note the decrease in success rate and the slowing increase  
12 of tested connections when the number of pipettes are increased. (D) Stacked bar graph of time  
13 needed for individual preparatory steps of single experiments for the 8-manipulator setup (n=9)  
14 and the 10-manipulator setup (n=9). Source data in Figure 4-source data.

15 **The number of tested synaptic connections (c) scales with more simultaneously**  
16 **recorded neurons (n) according to  $c = n \times (n - 1)$  (Fig. 4A).** However, increasing the  
17 number of neurons lowers the rate of obtaining a full cluster with successful recordings on all  
18 pipettes, even for skilled experimenters. This is not only due to more patch attempts, but also  
19 due to the increased risk of losing established recordings through mechanical interference or  
20 deterioration of recording quality during the prolonged total time of approaching and patching  
21 cells. To quantify this observation and provide an estimate for the performance of different  
22 setup configurations, we analysed our multipatch experiments on rodent slices from previous  
23 and ongoing studies without pipette cleaning (Böhm et al., 2015; Peng et al., 2017). For the  
24 performance analysis, we focused on rodent experiments to present an applicable use case  
25 for other labs which are not working with human slices.

26 On a setup with 6 manipulators we obtained on average  $5.3 \pm 0.7$  successful recordings per  
27 cluster with an average of  $23 \pm 7$  tested connections (mean  $\pm$  standard deviation, n = 30). This  
28 corresponds to an average success rate of  $88\% \pm 12\%$  which is, calculated as the ratio of  
29 successfully recorded cells to the maximum number of pipettes available per cluster (Fig. 4B).  
30 We refrained from manual replacement of failed pipettes due to the risk of losing the other

1 recordings. After scaling up to 8 pipettes, we could record from  $6.8 \pm 1$  cells on average  
 2 (success rate  $85\% \pm 13\%$ ) which increased the mean number of tested connections to  $41 \pm 13$   
 3 ( $n = 33$ ). On our setup with 10 pipettes, we recorded on average from  $7.9 \pm 1.1$  neurons with  
 4  $56 \pm 17$  tested connections which represents a further drop of the success rate to  $79\% \pm 11\%$   
 5 ( $n = 10$ ). Concurrently, the total experimental time needed before the start of recording the  
 6 electrophysiological properties of the neurons rose from  $36.6 \pm 2.3$  minutes (8 pipettes) to  $46.1$   
 7  $\pm 4.6$  minutes (10 pipettes), mostly due to increasing time needed to approach and patch the  
 8 cells ( $16.8 \pm 2.7$  min vs  $25.8 \pm 2.2$  min, Fig. 4D). Considering this drop in success rate and  
 9 increased experimental time, the upscaling of a conventional multipatch setup becomes  
 10 impractical at a certain point.

## 11 Pipette cleaning strategies for multipatch experiments

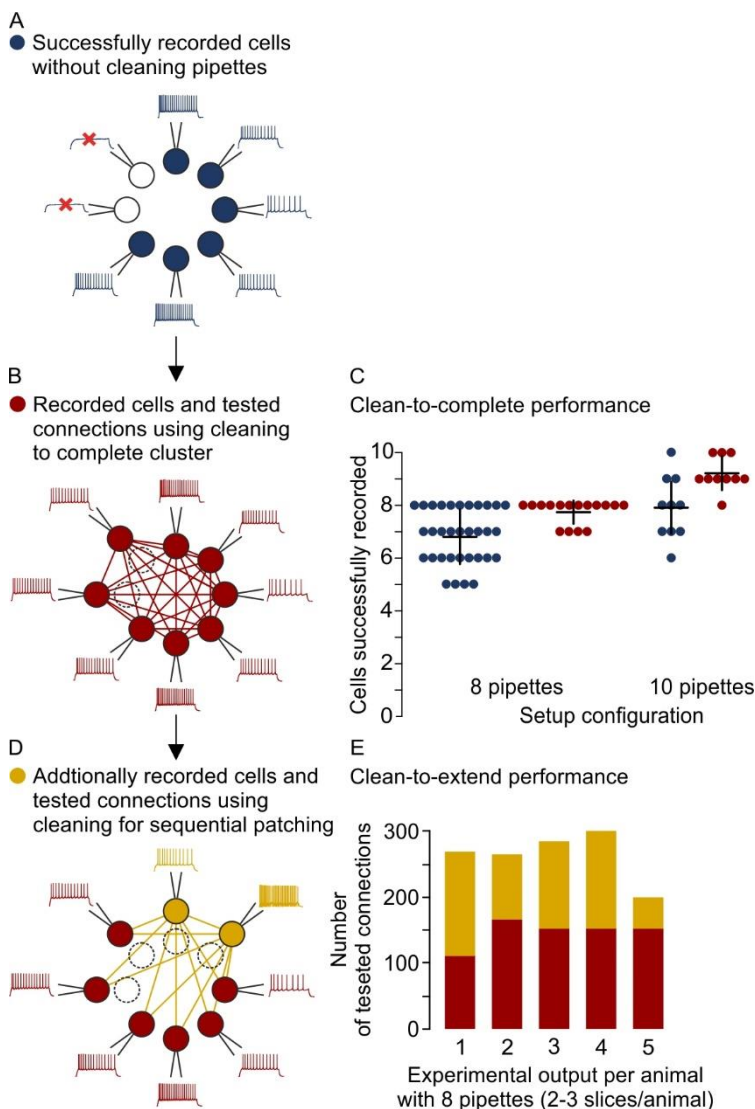

**Figure 5: Different strategies for cleaning pipettes.** (A) Scheme of successful whole-cell recordings on six pipettes (blue circles with action potentials) and failed patch attempts on two pipettes (white circles without action potentials). (B) Clean-to-complete: The two failed pipettes were cleaned and successful recordings were established from two neighbouring cells. Red circles represent a cluster that has been subject to pipette cleaning after failed patch attempts and the red lines indicate the tested synaptic connections. (C) Dot plot comparing the number of successfully recorded neurons in clusters without cleaning (blue) and with cleaning (red). Black crosses indicate mean and standard deviation. See Figure 5-source data 1. (D) Clean-to-extend: After recording of a cluster, individual pipettes can be cleaned and used to patch additional cells (yellow circles). Yellow lines indicate the synaptic connections that could be tested due to this approach. (E) Stacked bar graph depicting the number of tested connections of the initially recorded cluster with clean-to-complete (red) and the number of additionally tested connections after clean-to-extend (yellow) from 5 animals. Data were extracted from experiments in the rat presubiculum on the 8-manipulator setup. 2 to 3 slices were analysed from each animal in a time window

52 of 5 to 6 h. See Figure 5-source data 2.



1 **The automated pipette cleaning system can be applied in different ways to improve**  
2 **multipatch experiments.** As demonstrated above, multipatch setups will often fail to achieve  
3 their full potential due to a decreasing success rate with increasing pipette numbers. The  
4 automated pressure and cleaning system can solve this problem and increase the yield  
5 through more complete cluster recordings. Pipettes from failed recording attempts can be  
6 subject to immediate cleaning and reuse, even simultaneously to ongoing patch attempts with  
7 the next pipette (Fig. 5A). This clean-to-complete strategy increased the average cluster size  
8 on our setups with 8 and 10 pipettes to  $7.8 \pm 0.4$  (97%  $\pm$  5% success rate,  $n = 16$ ) and  $9.2 \pm$   
9  $0.6$  (92%  $\pm$  6% success rate,  $n = 9$ ), respectively (Fig. 5B). After recording of a full cluster, the  
10 cleaning system can be used to probe synaptic connections to cells outside of the initial cluster  
11 (clean-to-extend, Fig. 5D). Multiple pipettes can be selected and cleaned to establish new  
12 patch-clamp recordings with other cells of interest (Fig. 5E). This clean-to-extend approach  
13 allows screening of many additional synaptic connections with minimal time investment. The  
14 number of additionally probed connections ( $c_{new}$ ) is dependent on the number of newly patched  
15 ( $n_{new}$ ) and maintained neurons ( $n_{old}$ ):  $c_{new} = 2 \times (n_{new} \times n_{old}) + n_{new}(n_{new} - 1)$ . Using both  
16 strategies during rodent experiments on the 8-pipette setup with 2 to 3 recorded slices per  
17 animal, we could increase the number of tested connections from  $140 \pm 24$  to  $244 \pm 52$  on  
18 average per animal (Fig. 5D, mean  $\pm$  standard deviation,  $n = 6$  animals). Clean-to-extend can  
19 also be used to selectively patch more cells of interest while a set of cells are maintained. This  
20 would enable exploration of specific connectivity patterns and a more elaborate degree  
21 analysis of specific cells.

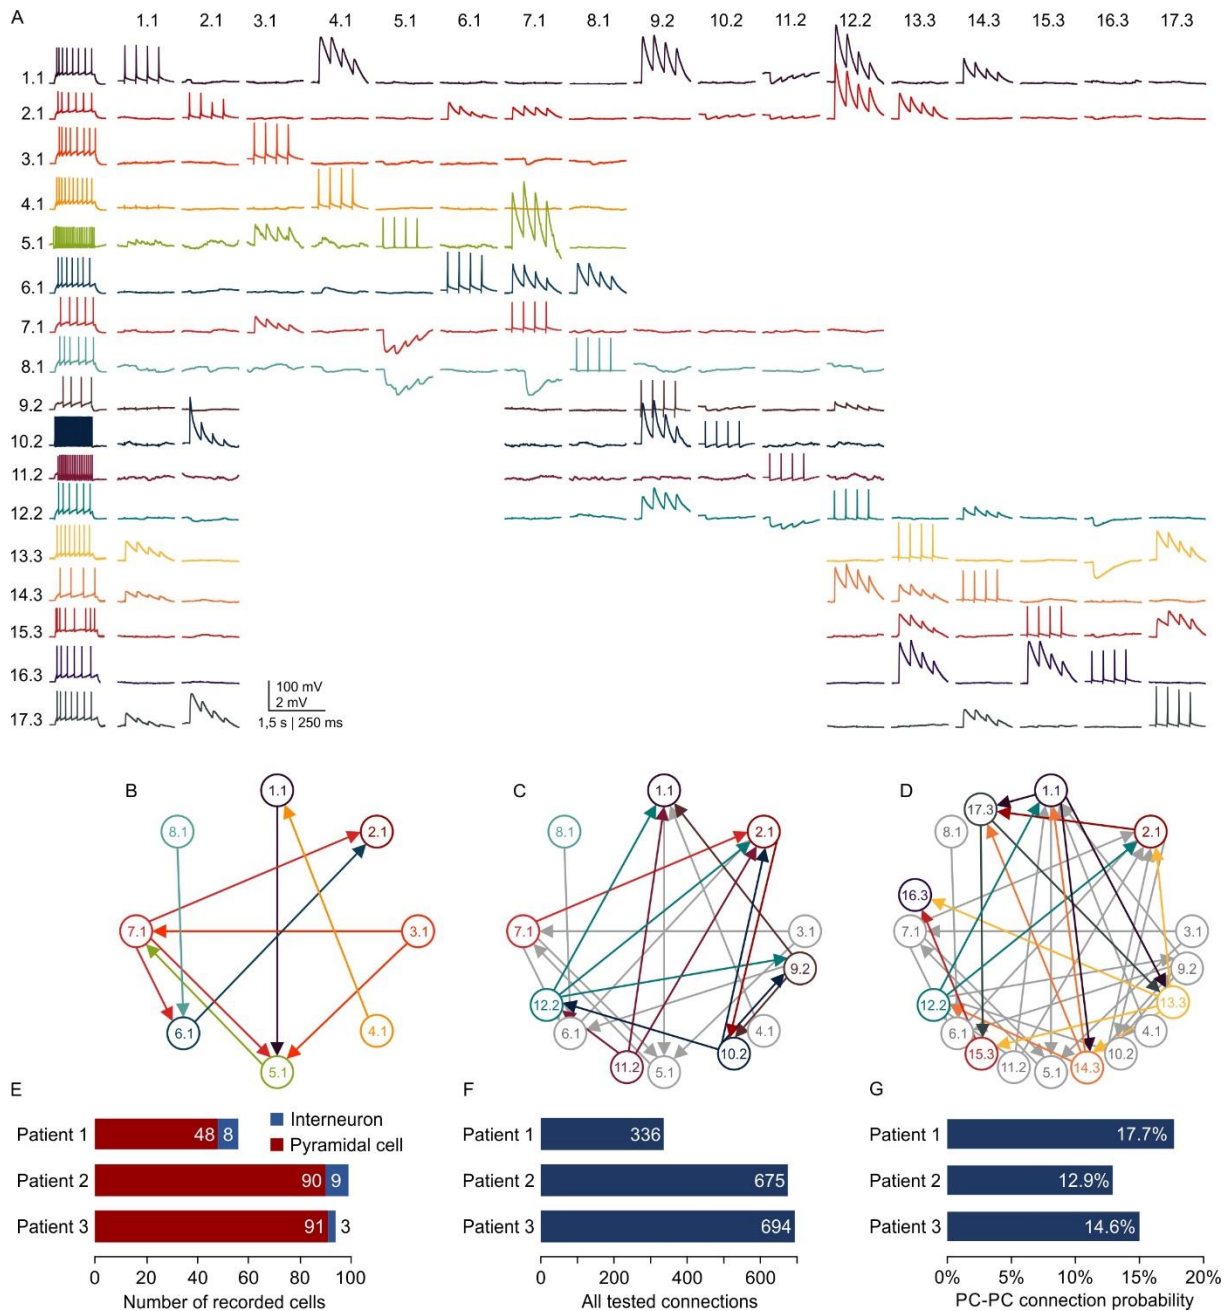

1 **Figure 6: Microcircuit analysis in human slices.** (A) Matrix of averaged voltage traces from 17  
2 neurons in one acute human slice recorded on the 8-manipulator setup with two rounds of clean-  
3 to-extend. Left column shows the firing pattern of the recorded neurons. In the first session 8  
4 neurons were patched simultaneously (cells numbered 1.1 - 8.1). Traces recorded from one cell  
5 are shown in a row with the same colour. Four action potentials were elicited in each neuron  
6 consecutively (diagonal of the matrix). The postsynaptic responses of the other neurons are  
7 aligned in the same column. After recording of the first full cluster of 8 neurons, 4 pipettes were  
8 cleaned and additional neurons in the vicinity were patched and recorded with the same  
9 stimulation protocol (9.2 - 12.2). After the second recording session, another 5 pipettes were  
10 subject to cleaning and 5 new neurons were patched, while the pipettes on neuron 1.1, 2.1 and  
11 12.2 were not removed. This allowed screening of additional connections among the neurons from  
12 the third recording session (13.3 - 17.3), but also connections between neurons from previous  
13 recording sessions (1.1, 2.1 and 12.2). Scale bar: Horizontal 1.5 s for firing pattern, 250 ms for  
14 connection screening. Vertical 100 mV for action potentials, 2 mV for postsynaptic traces. (B)  
15 Connectivity scheme of all neurons from the first recording session with arrows indicating a  
16 detected synaptic connection. (C) Scheme of connections after first cleaning round. Coloured  
17 arrows and circles indicate neurons and connections recorded in the second session. Neurons  
18 and connections of the first recording session are shown in grey. (D) Scheme of all recorded  
19 neurons and detected connections after two cleaning rounds. Neurons and connections recorded  
20 in this third session are coloured. Neurons and connections from previous recording sessions  
21 are shown in grey. In this slice, a total of 38 synaptic connections were detected out of 150 tested

1 connections. (E) Bar graphs depicting number of recorded interneurons and pyramidal cells from  
2 three patients recorded within the first 24 hours after slicing. (F) Number of tested connections  
3 in each patient recorded within the first 24 hours. (G) Connection probability between pyramidal  
4 cells calculated by the number of found to tested connections recorded within the first 24 hours.  
5 See Figure 6-source data.

6 **Combining multipatch setups with the optimizations and cleaning strategies allows for**  
7 **extensive and efficient analysis of human microcircuits.** Due to the scarce availability of  
8 human tissue from epilepsy resection surgery, a highly efficient usage of this material is  
9 desirable. With two rounds of clean-to-extend, we were able to record electrophysiological  
10 properties and the synaptic connections of up to 17 neighbouring neurons in one human slice  
11 (Fig. 6A). In this experiment, we maintained 2 neurons (1.1 & 1.2) across all further patch  
12 attempts providing information about their out- and in-connections to the other 16 neurons,  
13 respectively. This approach can unveil complex connectivity patterns between local neurons  
14 exceeding simple pairwise statistics (Fig. 6B-D). Using two setups simultaneously, we were  
15 able to record from up to 99 neurons and thereby probe 300 to 700 potential synaptic  
16 connections from individual patients within the first 24 hours after slicing. These sample sizes  
17 acquired from single patients are comparable to the pooled dataset from 22 patients in a  
18 previous report (Seeman et al., 2018). We found excitatory connectivity between pyramidal  
19 cells in human cortical layer 2/3 ranging from 12.9% to 17.7% which is similar to those reported  
20 previously (Boldog et al., 2018; Seeman et al., 2018; Szegedi et al., 2016). This substantial  
21 improvement in multipatch experiment yield has the potential to facilitate systematic analysis  
22 of complex network properties on the level of individuals in humans and other species.

## 23 **Discussion**

24 **In this report, we demonstrate that equipping an in vitro multipatch setup with an**  
25 **automated pipette cleaning system and adding further optimizations, increases the**  
26 **experimental yield and generates sufficient data for microcircuit analysis within single**  
27 **patients.** This represents a substantial increase in performance and experimental output  
28 compared to previous studies on synaptic connectivity, which usually require pooling of data  
29 across multiple subjects to achieve statistically significant results (Seeman et al., 2018;  
30 Thomson and Lamy, 2007). With 300 to 600 probed connections per patient, correlation of

1 microcircuit properties to individual patient characteristics are now becoming feasible as has  
2 been shown for dendritic morphology and action potential kinetics (Goriounova et al., 2018).  
3 Applied to animal studies, this approach can reduce the number of animals needed to reach  
4 statistically significant findings. This is especially important when investigating animal models  
5 where ethical considerations prohibit large cohorts due to harmful interventions.

6 **The possibility to further explore the connectivity of neurons through clean-to-extend**  
7 **allows microcircuit analysis on a larger scale.** While manual replacement of pipettes is  
8 possible, the risk of mechanical disruption of the recordings up to now prevented extensive  
9 practice of patching cells sequentially. Therefore, studies on synaptic connectivity have been  
10 limited by the number of available manipulators. Increasing the sample size of recorded  
11 neurons and tested synaptic connections through clean-to-extend now enables a more  
12 comprehensive analysis of the microcircuit. This is especially relevant as theoretical work has  
13 identified higher order network parameters such as triadic motifs and simplices as relevant  
14 topological constraints for microcircuit computation (Perin et al., 2011; Reimann et al., 2017;  
15 Song et al., 2005). A minimum of 3 to 4 neurons per cluster is necessary for triplet analyses,  
16 while increasing the number leads to larger sample sizes and enables higher dimensional  
17 parameters. This increase in sample size per cluster also enables a better assessment of slice  
18 to slice variability, which can help to control for methodological artefacts or confounding  
19 biological parameters. However, our impression is that increasing setups beyond 10  
20 manipulators would come with a serious trade-off regarding experimental time and success  
21 rate. Clean-to-extend enables increasing the number of probed connections of neurons  
22 beyond this limitation which is important for network statistics such as the sample degree  
23 correlation and can be utilized for further novel graph statistics (Vegu e et al., 2017).

24 **We addressed technical challenges in establishing and operating a highly advanced**  
25 **multipatch setup and provide extensive documentation on how to implement**  
26 **optimizations making this method easier to handle.** Patch-clamp electrophysiology is a  
27 widespread and established method, but operating multiple manipulators still requires skilled  
28 researchers with long training. The low-cost and user-friendly solutions presented here can be

1 used to upgrade existing patch-clamp setups with single or multiple manipulators. This could  
2 enable other labs to adopt the multi-neuron approach and use the optimizations to reduce  
3 experimental errors and generate results faster. Additionally, semi-automated pipette  
4 positioning as well as repetitive pipette cleaning without the need for manual replacement can  
5 help novel experimentalists to focus on the crucial steps of cell patching and may reduce the  
6 training time.

7 **While fully automated in-vivo patch-clamp experiments are valuable due to limited**  
8 **visual information for manual patching (Kodandaramaiah et al., 2018, 2012; Suk et al.,**  
9 **2017), the advantage of fully automated in-vitro patch-clamp is less clear.** We found that  
10 manual adjustments during the visually guided approach of the cell and the fine-tuned  
11 application of pressure to obtain a whole-cell configuration yielded higher success rates (88%  
12 / 85% / 79% on 6-/8-/10-manipulator setup) compared to those reported using a fully  
13 automated system which reported a success rate of 43% using one pipette (Wu et al., 2016).  
14 Our semi-automated pipette positioning approach was faster (53 / 55 s per pipette on 8-/10-  
15 manipulator setup) than the fully automated method (103 s using one pipette) while the time  
16 needed to manually approach the cell and establish a whole-cell configuration was slightly  
17 higher (126 / 154 s per pipette on 8-/10-manipulator setup vs 120 s). Further optimized  
18 algorithms with better performance could be combined with pipette cleaning to improve the  
19 success rate and speed of multipatch experiments. However, we currently believe that fully  
20 automated multipatch experiments would require a disproportionate amount of effort for the  
21 resulting increase in performance. Also, slice exchange and cell selection would still require  
22 human presence.

23 **Compared to other methods, the multipatch approach provides superior access to**  
24 **cellular and synaptic properties with a trade-off regarding the size of the sampled**  
25 **network.** All-optical approaches using channelrhodopsins to stimulate individual neurons and  
26 fluorescent calcium or voltage indicators to measure their responses can be used to probe  
27 connectivity of a higher number of cells than the multipatch approach (Emiliani et al., 2015).  
28 Simultaneous optical stimulation and recording using calcium indicators have been performed



1 in up to 20 neurons (Packer et al., 2014). However, calcium transients cannot reach single  
2 action potential or subthreshold resolution, potentially missing subthreshold monosynaptic  
3 connections. Voltage indicators can resolve subthreshold signals with higher temporal  
4 resolution than calcium imaging and have been shown to detect monosynaptic connections  
5 combined with optical stimulation in organotypical slices (Hochbaum et al., 2014). But technical  
6 challenges such as imaging speed and high illumination intensities still limit its application for  
7 large network investigations in acute brain slices. While calcium imaging can also be applied  
8 in-vivo, multipatch in this condition is technically very challenging and thus far limited to a  
9 maximum of 4 pipettes (Jouhanneau et al., 2018; Kodandaramaiah et al., 2018). Patch-clamp  
10 recordings can furthermore be combined with presynaptic stimulation using extracellular  
11 electrodes, channelrhodopsin or glutamate uncaging to further map synaptic inputs from more  
12 neurons (Fino and Yuste, 2011; Jäckel et al., 2017; Wang et al., 2015). These approaches do  
13 not resolve electrophysiological and anatomical properties and further connectivity of the  
14 presynaptic neurons, but they can be used to complement the multipatch approach. Finally,  
15 multipatch experiment do not need genetically modified cells and can be applied on brain slices  
16 from a variety of species.

17 **Taken together, the experimental advances presented here enables highly efficient**  
18 **extraction of microcircuit parameters from human cortical tissue even allowing**  
19 **comparisons between individual patients.** The potential to analyse reciprocal connections  
20 of more than 10 neurons in one cluster will help to develop more sophisticated subgraph  
21 metrics, strengthening the inference onto the underlying microcircuit. Finally, this versatile  
22 method can be applied to various species to uncover overarching principles of microcircuit  
23 topology.

## 24 **Materials and methods**

### 25 **Human and animal tissue**

26 Human tissue was acquired from temporal lobe resections of patients with pharmaco-resistant  
27 temporal lobe epilepsy. All patients gave a written consent for the scientific use of the resected

1 tissue. All procedures adhered to ethical requirements and were in accordance to the  
2 respective ethical approval (EA2/111/14).

3 Performance data of rodent multipatch experiments without cleaning were extracted from  
4 previous studies on mouse subiculum (6-pipette setup; Böhm et al., 2018) and rat  
5 presubiculum (8-pipette setup; Peng et al., 2017). Performance data with cleaning on the 8-  
6 manipulator setup were extracted from unpublished rat presubiculum experiments and all  
7 performance data on the 10-manipulator setup were extracted from unpublished rat motor  
8 cortex experiments. Experimental times were documented during a subset of experiments.  
9 Acute brain slices were prepared from 19 to 35 days old transgenic Wistar rats expressing  
10 Venus-YFP under the VGAT promotor (Peng et al., 2017; Uematsu et al., 2008) or from 21 to  
11 42 days old male C57BL/6N mice (Böhm et al., 2015). Animal handling and all procedures  
12 were carried out in accordance with guidelines of local authorities (Berlin, [T0215/11],  
13 [T0109/10]), the German Animal Welfare Act and the European Council Directive 86/609/EEC.

#### 14 **Slice preparation**

15 Experimental procedure on human tissue was as previously described (Lehnhoff et al., 2019).  
16 In brief, tissue samples were collected at the operating theatre and transferred to the laboratory  
17 within 30 to 40 minutes in cooled sucrose based aCSF enriched with carbogen (95% O<sub>2</sub>, 5%  
18 CO<sub>2</sub>). They were cut in ice-cold sucrose aCSF containing (in mM): 87 NaCl, 2.5 KCl, 3 MgCl<sub>2</sub>,  
19 0.5 CaCl<sub>2</sub>, 10 glucose, 75 sucrose, 1.25 NaH<sub>2</sub>PO<sub>4</sub>, and 25 NaHCO<sub>3</sub> (310 mOsm), enriched  
20 with carbogen (95% O<sub>2</sub>, 5% CO<sub>2</sub>). After removal of residual pia, the tissue was cut into 400  
21 µm thick slices and subsequently stored in sucrose aCSF solution heated to 34°C for 30  
22 minutes recovery. Slice thickness was 400 µm. In a subset of experiments, an antibiotic was  
23 added to the incubation solution (minocycline 2 nM). Subsequently and until recording, the  
24 slices were stored at room temperature. Whole-cell recordings were performed at 34 °C under  
25 submerged conditions, the bath chamber was perfused with an aCSF solution containing (in  
26 mM): 125 NaCl, 2.5 KCl, 1 MgCl<sub>2</sub>, 2 CaCl<sub>2</sub>, 10 glucose, 1.25 NaH<sub>2</sub>PO<sub>4</sub>, and 25 NaHCO<sub>3</sub> (300  
27 mOsm). Patch pipettes were pulled from borosilicate glass capillaries (2 mm outer / 1 mm inner  
28 diameter; Hilgenberg) on a horizontal puller (P-97, Sutter Instrument Company) and filled with

1 intracellular solution containing (in mM): 130 K-gluconate, 2 MgCl<sub>2</sub>, 0.2 EGTA, 10 Na<sub>2</sub>-  
2 phosphocreatine, 2 Na<sub>2</sub>ATP, 0.5 Na<sub>2</sub>GTP, 10 HEPES buffer and 0.1% biocytin (290–295  
3 mOsm, pH adjusted to 7.2 with KOH).

4 The rat experiments were performed as previously reported (Peng et al., 2017). After isoflurane  
5 anaesthesia and decapitation, the head was submerged in an ice-cold sucrose artificial  
6 cerebrospinal fluid solution containing (in mM): 80 NaCl, 2.5 KCl, 3 MgCl<sub>2</sub>, 0.5 CaCl<sub>2</sub>, 25  
7 glucose, 85 sucrose, 1.25 NaH<sub>2</sub>PO<sub>4</sub> and 25 NaHCO<sub>3</sub> (320–330 mOsm), enriched with  
8 carbogen (95% O<sub>2</sub>, 5% CO<sub>2</sub>). Brain slices of 300 μm thickness were cut on a Leica VT1200  
9 vibratome (Leica Biosystems) and subsequently stored in the sucrose aCSF solution. After a  
10 recovery period of 30 minutes at 30°C, the slices were stored at room temperature. Whole-cell  
11 recordings were performed under submerged conditions, the bath chamber was perfused with  
12 an aCSF solution containing (in mM): 125 NaCl, 2.5 KCl, 1 MgCl<sub>2</sub>, 2 CaCl<sub>2</sub>, 25 glucose, 1.25  
13 NaH<sub>2</sub>PO<sub>4</sub>, and 25 NaHCO<sub>3</sub> (310–320mOsm). The solution was enriched with carbogen (95%  
14 O<sub>2</sub>, 5% CO<sub>2</sub>) and heated to 34°C. Patch pipettes were pulled in the same way as for the  
15 human slice experiments and filled with intracellular solution containing (in mM): 130 K-  
16 gluconate, 6 KCl, 2 MgCl<sub>2</sub>, 0.2 EGTA, 5 Na<sub>2</sub>-phosphocreatine, 2 Na<sub>2</sub>ATP, 0.5 Na<sub>2</sub>GTP, 10  
17 HEPES buffer and 0.1% biocytin (290–300 mOsm, pH adjusted to 7.2 with KOH).

18 Hardware components used for visualization and electrophysiological recordings are listed in  
19 table 1. Data were low-pass filtered at 6 kHz using the built in four-pole Bessel filter and  
20 digitized at a sampling rate of 20 kHz. For synaptic connectivity screening, all cells were  
21 recorded in current clamp mode and held near –60 mV by means of constant and adjusting  
22 current injection. Four action potentials were elicited in each cell at 20 Hz with 1-4 nA for 1-3  
23 ms and postsynaptic responses in the other cells were detected in the averaged traces from  
24 30 to 50 sweeps. Successful recordings were defined by a sufficiently high seal-resistance,  
25 resting membrane potentials of the cells more negative than -50 mV (not corrected for liquid  
26 junction potential), long-term recording stability, and the ability of the neurons to produce  
27 characteristic action potential patterns during sustained step depolarisations.

## 1 Acknowledgement

2 We are grateful to the patients for providing the tissue and thank P. Fidzinski and M. Holtkamp  
3 for clinical organization and assistance. We also thank L. Faraj for support during the creation  
4 of the pressure system assembly guide and I. Vida for providing the transgenic rats. We thank  
5 the mechanical workshop of the Charité-Universitätsmedizin Berlin for technical assistance  
6 and fabrication of the custom-made components. We thank Jochen Winterer and Rosanna  
7 Sammons for helpful comments on an earlier version of the manuscript.

## 8 References

- 9 Böhm C, Peng Y, Geiger JR, Schmitz D. 2018. Routes to, from and within the subiculum.  
10 *Cell and Tissue Research* **373**:557–563. doi:10.1007/s00441-018-2848-4  
11
- 12 Böhm C, Peng Y, Maier N, Winterer J, Poulet J, Geiger J, Schmitz D. 2015. Functional  
13 Diversity of Subicular Principal Cells during Hippocampal Ripples. *J Neurosci* **35**:13608–  
14 13618. doi:10.1523/JNEUROSCI.5034-14.2015  
15
- 16 Boldog E, Bakken TE, Hodge RD, Novotny M, Aevermann BD, Baka J, Bordé S, Close JL,  
17 Diez-Fuertes F, Ding S-L, Faragó N, Kocsis ÁK, Kovács B, Maltzer Z, McCarrison JM, Miller  
18 JA, Molnár G, Oláh G, Ozsvár A, Rózsa M, Shehata SI, Smith KA, Sunkin SM, Tran DN,  
19 Venepally P, Wall A, Puskás LG, Barzó P, Steemers FJ, Schork NJ, Scheuermann RH,  
20 Lasken RS, Lein ES, Tamás G. 2018. Transcriptomic and morphophysiological evidence for  
21 a specialized human cortical GABAergic cell type. *Nat Neurosci* **21**:1185–1195.  
22 doi:10.1038/s41593-018-0205-2  
23
- 24 Cossell L, Iacaruso M, Muir DR, Houlton R, Sader EN, Ko H, Hofer SB, Mrcic-Flogel TD.  
25 2015. Functional organization of excitatory synaptic strength in primary visual cortex. *Nature*  
26 **518**:399–403. doi:10.1038/nature14182  
27
- 28 Douglas RJ, Martin KA. 2004. Neuronal circuits of the neocortex. *Annual review of*  
29 *neuroscience* **27**:419–51. doi:10.1146/annurev.neuro.27.070203.144152  
30
- 31 Emiliani V, Cohen AE, Deisseroth K, Häusser M. 2015. All-Optical Interrogation of Neural  
32 Circuits. *J Neurosci* **35**:13917–13926. doi:10.1523/jneurosci.2916-15.2015  
33
- 34 Fino E, Yuste R. 2011. Dense Inhibitory Connectivity in Neocortex. *Neuron* **69**:1188–1203.  
35 doi:10.1016/j.neuron.2011.02.025  
36
- 37 Geiger J, Lübke J, Roth A, Frotscher M, Jonas P. 1997. Submillisecond AMPA receptor-  
38 mediated signaling at a principal neuron-interneuron synapse. *Neuron* **18**:1009–23.  
39
- 40 Goriounova NA, Heyer DB, Wilbers R, Verhoog MB, Giugliano M, Verbist C, Obermayer J,  
41 Kerkhofs A, Smeding H, Verberne M, Idema S, Baayen JC, Pieneman AW, de Kock CP,  
42 Klein M, Mansvelder HD. 2018. Large and fast human pyramidal neurons associate with  
43 intelligence. *eLife* **7**:e41714. doi:10.7554/elife.41714  
44
- 45 Guzman S, Schlögl A, Frotscher M, Jonas P. 2016. Synaptic mechanisms of pattern  
46 completion in the hippocampal CA3 network. *Science* **353**:1117–1123.

- 1 doi:10.1126/science.aaf1836  
2  
3 Hochbaum DR, Zhao Y, Farhi SL, Klapoetke N, Werley CA, Kapoor V, Zou P, Kralj JM,  
4 Maclaurin D, Smedemark-Margulies N, Saulnier JL, Boulting GL, Straub C, Cho Y,  
5 Melkonian M, Wong G, Harrison JD, Murthy VN, Sabatini BL, Boyden ES, Campbell RE,  
6 Cohen AE. 2014. All-optical electrophysiology in mammalian neurons using engineered  
7 microbial rhodopsins. *Nature Methods* **11**:nmeth.3000. doi:10.1038/nmeth.3000  
8  
9 Jäckel D, Bakkum DJ, Russell TL, Müller J, Radivojevic M, Frey U, Franke F, Hierlemann A.  
10 2017. Combination of High-density Microelectrode Array and Patch Clamp Recordings to  
11 Enable Studies of Multisynaptic Integration. *Sci Rep-uk* **7**:978. doi:10.1038/s41598-017-  
12 00981-4  
13  
14 Jiang X, Shen S, Cadwell CR, Berens P, Sinz F, Ecker AS, Patel S, Tolias AS. 2015.  
15 Principles of connectivity among morphologically defined cell types in adult neocortex.  
16 *Science (New York, NY)* **350**:aac9462. doi:10.1126/science.aac9462  
17  
18 Jouhanneau J-S, Kremkow J, Poulet JF. 2018. Single synaptic inputs drive high-precision  
19 action potentials in parvalbumin expressing GABA-ergic cortical neurons in vivo. *Nature*  
20 *Communications* **9**:1540. doi:10.1038/s41467-018-03995-2  
21  
22 Kalmbach BE, Buchin A, Long B, Close J, Nandi A, Miller JA, Bakken TE, Hodge RD, Chong  
23 P, de Frates R, Dai K, Maltzer Z, Nicovich PR, Keene DC, Silbergeld DL, Gwinn RP, Cobbs  
24 C, Ko AL, Ojemann JG, Koch C, Anastassiou CA, Lein ES, Ting JT. 2018. h-Channels  
25 Contribute to Divergent Intrinsic Membrane Properties of Supragranular Pyramidal Neurons  
26 in Human versus Mouse Cerebral Cortex. *Neuron*. doi:10.1016/j.neuron.2018.10.012  
27  
28 Kodandaramaiah SB, Flores FJ, Holst GL, Singer AC, Han X, Brown EN, Boyden ES, Forest  
29 CR. 2018. Multi-neuron intracellular recording in vivo via interacting autpatching robots.  
30 *eLife* **7**:e24656. doi:10.7554/eLife.24656  
31  
32 Kodandaramaiah SB, Franzesi G, Chow BY, Boyden ES, Forest CR. 2012. Automated  
33 whole-cell patch-clamp electrophysiology of neurons in vivo. *Nat Methods* **9**:585.  
34 doi:10.1038/nmeth.1993  
35  
36 Kodandaramaiah SB, Holst GL, Wickersham IR, Singer AC, Franzesi G, McKinnon ML,  
37 Forest CR, Boyden ES. 2016. Assembly and operation of the autpatcher for automated  
38 intracellular neural recording in vivo. *Nature Protocols* **11**:634–654.  
39 doi:10.1038/nprot.2016.007  
40  
41 Kolb I, Stoy W, Rousseau E, Moody O, Jenkins A, Forest C. 2016. Cleaning patch-clamp  
42 pipettes for immediate reuse. *Scientific Reports* **6**:35001. doi:10.1038/srep35001  
43  
44 Lehnhoff J, Strauss U, Wierschke S, Grosser S, Pollali E, Schneider UC, Holtkamp M,  
45 Dehnicke C, Deisz RA. 2019. The anticonvulsant lamotrigine enhances I<sub>h</sub> in layer 2/3  
46 neocortical pyramidal neurons of patients with pharmacoresistant epilepsy.  
47 *Neuropharmacology* **144**:58–69. doi:10.1016/j.neuropharm.2018.10.004  
48  
49 Machu T, Mihic JS, Dildy-Mayfield J. 1998. Selective actions of a detergent on ligand-gated  
50 ion channels expressed in *Xenopus* oocytes. *J Pharmacol Exp Ther* **284**:32–6.  
51  
52 Machu T, Mihic S, Dildy-Mayfield J. n.d. Selective actions of a detergent on ligand-gated ion  
53 channels expressed in *Xenopus* oocytes. *The Journal of pharmacology and experimental*  
54 *therapeutics* **284**:32–6.  
55  
56 Markram H, Toledo-Rodriguez M, Wang Y, Gupta A, Silberberg G, Wu C. 2004. Interneurons



- 1 of the neocortical inhibitory system. *Nature Reviews Neuroscience* **5**:793–807.  
2 doi:10.1038/nrn1519  
3
- 4 Molnár G, Rózsa M, Baka J, Holderith N, Barzó P, Nusser Z, Tamás G. 2016. Human  
5 pyramidal to interneuron synapses are mediated by multi-vesicular release and multiple  
6 docked vesicles. *eLife* **5**:e18167. doi:10.7554/eLife.18167  
7
- 8 Packer AM, Russell LE, Dalgleish HW, Häusser M. 2014. Simultaneous all-optical  
9 manipulation and recording of neural circuit activity with cellular resolution in vivo. *Nature*  
10 *Methods* **12**:140–146. doi:10.1038/nmeth.3217  
11
- 12 Peng Y, Tomás FJ, Klisch C, Vida I, Geiger JR. 2017. Layer-Specific Organization of Local  
13 Excitatory and Inhibitory Synaptic Connectivity in the Rat Presubiculum. *Cereb Cortex* **1**–18.  
14 doi:10.1093/cercor/bhx049  
15
- 16 Perin R, Berger TK, Markram H. 2011. A synaptic organizing principle for cortical neuronal  
17 groups. *Proceedings of the National Academy of Sciences* **108**:5419–5424.  
18 doi:10.1073/pnas.1016051108  
19
- 20 Perin R, Markram H. 2013. A computer-assisted multi-electrode patch-clamp system. *Journal*  
21 *of visualized experiments : JoVE* e50630. doi:10.3791/50630  
22
- 23 Reimann MW, Nolte M, Scolamiero M, Turner K, Perin R, Chindemi G, Dłotko P, Levi R,  
24 Hess K, Markram H. 2017. Cliques of Neurons Bound into Cavities Provide a Missing Link  
25 between Structure and Function. *Frontiers in Computational Neuroscience* **11**:48.  
26 doi:10.3389/fncom.2017.00048  
27
- 28 Russell W, Burch R, Hume C. 1959. The principles of humane experimental technique **238**.  
29
- 30 Seeman SC, Campagnola L, Davoudian PA, Hoggarth A, Hage TA, Bosma-Moody A, Baker  
31 CA, Lee J, Mihalas S, Teeter C, Ko AL, Ojemann JG, Gwinn RP, Silbergeld DL, Cobbs C,  
32 Phillips J, Lein E, Murphy G, Koch C, Zeng H, Jarsky T. 2018. Sparse recurrent excitatory  
33 connectivity in the microcircuit of the adult mouse and human cortex. *eLife* **7**:e37349.  
34 doi:10.7554/elife.37349  
35
- 36 Song S, Sjöström P, Reigl M, Nelson S, Chklovskii DB. 2005. Highly Nonrandom Features of  
37 Synaptic Connectivity in Local Cortical Circuits. *Plos Biol* **3**:e68.  
38 doi:10.1371/journal.pbio.0030068  
39
- 40 Suk H-J, van Welie I, Kodandaramaiah SB, Allen B, Forest CR, Boyden ES. 2017. Closed-  
41 Loop Real-Time Imaging Enables Fully Automated Cell-Targeted Patch-Clamp Neural  
42 Recording In Vivo. *Neuron* **95**:1037-1047.e11. doi:10.1016/j.neuron.2017.08.011  
43
- 44 Szegedi V, Paizs M, Csakvari E, Molnar G, Barzo P, Tamas G, Lamsa K. 2016. Plasticity in  
45 Single Axon Glutamatergic Connection to GABAergic Interneurons Regulates Complex  
46 Events in the Human Neocortex. *PLOS Biology* **14**:e2000237.  
47 doi:10.1371/journal.pbio.2000237  
48
- 49 Thomson AM, Lamy C. 2007. Functional maps of neocortical local circuitry. *Frontiers in*  
50 *Neuroscience* **1**:2. doi:10.3389/neuro.01.1.1.002.2007  
51
- 52 Uematsu M, Hirai Y, Karube F, Ebihara S, Kato M, Abe K, Obata K, Yoshida S, Hirabayashi  
53 M, Yanagawa Y, Kawaguchi Y. 2008. Quantitative chemical composition of cortical  
54 GABAergic neurons revealed in transgenic venus-expressing rats. *Cereb Cortex* **18**:315–30.  
55 doi:10.1093/cercor/bhm056  
56

- 1 Vegué M, Perin R, Roxin A. 2017. On the structure of cortical micro-circuits inferred from  
2 small sample sizes. *The Journal of Neuroscience* 0984–17. doi:10.1523/jneurosci.0984-  
3 17.2017  
4
- 5 Wang G, Wyskiel DR, Yang W, Wang Y, Milbern LC, Lalanne T, Jiang X, Shen Y, Sun Q-  
6 QQ, Zhu J. 2015. An optogenetics- and imaging-assisted simultaneous multiple patch-clamp  
7 recording system for decoding complex neural circuits. *Nature protocols* **10**:397–412.  
8 doi:10.1038/nprot.2015.019  
9
- 10 Winterer J, Maier N, Wozny C, Beed P, Breustedt J, Evangelista R, Peng Y, D’Albis T,  
11 Kempter R, Schmitz D. 2017. Excitatory Microcircuits within Superficial Layers of the Medial  
12 Entorhinal Cortex. *Cell Reports* 19:1110–1116. doi:10.1016/j.celrep.2017.04.041  
13
- 14 Wu Q, Kolb I, Callahan BM, Su Z, Stoy W, Kodondaramaiah SB, Neve R, Zeng H, Boyden  
15 ES, Forest CR, Chubykin AA. 2016. Integration of autopatching with automated pipette and  
16 cell detection in vitro. *J Neurophysiol* **116**:1564–1578. doi:10.1152/jn.00386.2016  
17

1 **Rich media files:**

2 **Video 1: Automated cleaning of all pipettes on a 10-multipatch setup.**

3 The main image depicts a front view of the 10-manipulator setup with all manipulators subject  
4 to automated movements during a pipette cleaning sequence. The insert on the bottom left  
5 corner shows a close-up view of the pipettes and the recording chamber. For better overview,  
6 the two front manipulators were moved aside. The insert on the bottom right corner shows the  
7 DIC microscope view with a 4x objective. At the end of the sequence all pipettes are out of  
8 focus, due to different final z-positions. The time stamp in the middle shows the elapsed time  
9 in seconds. Roughly 20 second of alternating pressure sequence was cut (second 13 to 32).  
10 The last 8 second sequence shows the pressure system while switching between pressure  
11 levels. The clicking noise is generated by the relais switches.

12

13 **Video 2: Pipette positioning algorithm.**

14 This video shows the pipette movements during the positioning phase under the DIC  
15 microscope. The first sequence is in a 5x time lapse with the 4x objective. Pipettes are moved  
16 in and out automatically, note the small manual adjustments in between. The second sequence  
17 is played in real time and shows all pipettes moving to their adjusted target position underneath  
18 the 40x objective.

19

20 **Supplementary File:**

21 One PDF document (“Supplementary Materials”) with the following content:

|    |                                                    |           |
|----|----------------------------------------------------|-----------|
| 22 | <b>1. Pressure and cleaning system</b>             | <b>2</b>  |
| 23 | a. Overview of components                          | 2         |
| 24 | b. Layout of acrylic sheets                        | 5         |
| 25 | c. Wiring scheme of components for pressure system | 7         |
| 26 | d. Assembly guide                                  | 8         |
| 27 | <b>2. Matlab code</b>                              | <b>14</b> |
| 28 | a. GUI instructions                                | 14        |
| 29 | b. Pipette positioning algorithm                   | 15        |
| 30 | <b>3. Construction drawings</b>                    | <b>16</b> |
| 31 | a. Recording chamber                               | 16        |
| 32 | b. Custom stages                                   | 18        |
| 33 | c. Pipette filling device                          | 19        |
| 34 | d. Analog output routing device                    | 22        |

## Supplementary materials

|                                                       |    |
|-------------------------------------------------------|----|
| <b>Pressure and cleaning system</b> .....             | 2  |
| Overview of components .....                          | 2  |
| Layout of acrylic sheets .....                        | 5  |
| Wiring scheme of components for pressure system ..... | 7  |
| Assembly guide .....                                  | 8  |
| <b>Matlab code</b> .....                              | 14 |
| GUI instructions .....                                | 14 |
| Pipette positioning algorithm.....                    | 15 |
| <b>Construction drawings</b> .....                    | 16 |
| Recording chamber .....                               | 16 |
| Custom stages.....                                    | 18 |
| Pipette filling device .....                          | 19 |
| Analog output routing device .....                    | 22 |

## Pressure and cleaning system

### Overview of components

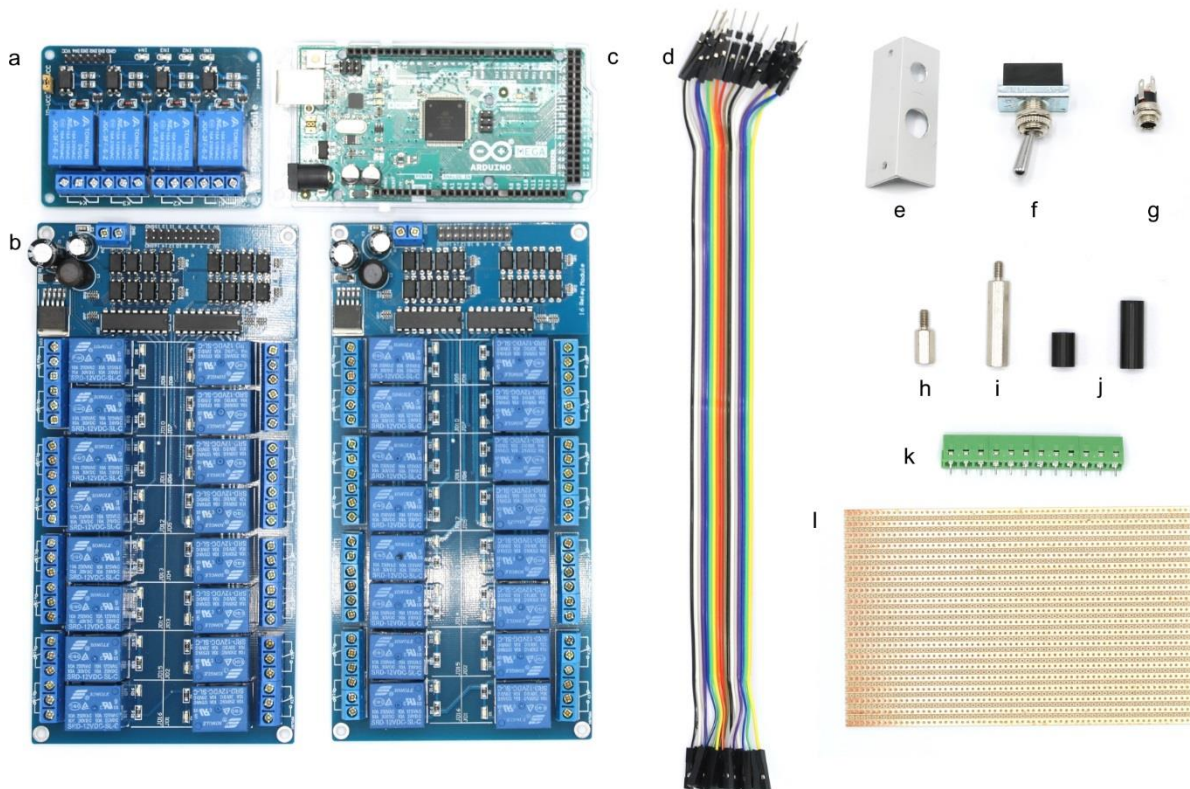

| # | Electronic parts                                          | Amount/<br>pieces | Supplier/<br>producer* | Part<br>number*   | Unit<br>cost €* | Total<br>cost €* |
|---|-----------------------------------------------------------|-------------------|------------------------|-------------------|-----------------|------------------|
| a | 4-channel relay board 5 V                                 | 1                 | sertronics             | RELM-4            | 3.19            | 3.19             |
| b | 16-channel relay board 12 V                               | 2                 | sertronics             | RELM-16           | 16.72           | 33.45            |
| c | Arduino Mega 2560<br>microcontroller                      | 1                 | reichelt               | ARDUINO<br>MEGA   | 26.81           | 26.81            |
| d | 20 position male to female<br>jumper wire, 20 cm length   | 2                 | reichelt               | DEBO<br>KABELSET  | 3.24            | 6.47             |
|   | power supply 80W,<br>12 V / 6,67 A                        | 1                 | reichelt               | MW<br>GST90A12    | 25.59           | 25.59            |
| e | aluminium angle 20 x 20 x 2 mm                            | 20 cm             | alusteck               | W20202            | 1.58            | 1.58             |
| f | ON/OFF switch, 250 V / 6 A                                | 1                 | reichelt               | MAR<br>1821.1101  | 1.67            | 1.67             |
| g | DC barrel power connector,<br>2.5 mm center pole diameter | 1                 | reichelt               | HEBL 25           | 0.34            | 0.34             |
| h | metal spacer hexagonal,<br>male/female M3, 10 mm          | 14                | reichelt               | DA 10MM           | 0.11            | 1.53             |
| i | metal spacer hexagonal,<br>male/female M3, 25 mm          | 24                | reichelt               | DA 25MM           | 0.17            | 4.03             |
| j | plastic spacer, M3, 10 mm                                 | 4                 | reichelt               | DK 10MM           | 0.03            | 0.12             |
| j | plastic spacer, M3, 20 mm                                 | 2                 | reichelt               | DK 20MM           | 0.03            | 0.06             |
| k | screw terminal block, PCB<br>mount, 12 pole               | 6                 | reichelt               | RND 205-<br>00242 | 0.83            | 4.99             |
| l | stripboard, pitch corresponding<br>to screw terminal      | 2                 | reichelt               | H5SR160           | 1.35            | 2.69             |
|   | acrylic plate, 31 x 27 cm, 10 mm<br>thickness             | 1                 | Express-<br>zuschnitt  | AGS-100-<br>TRA   | 11.20           | 11.20            |
|   | acrylic plate, 24 x 19 cm, 5 mm<br>thickness              | 1                 | Express-<br>zuschnitt  | AGS-50-<br>TRA    | 5.97            | 5.97             |

|                                                     |      |          |              |      |      |
|-----------------------------------------------------|------|----------|--------------|------|------|
| hexagonal nut, M3                                   | 100  | reichelt | SK M3        | 0.83 | 0.83 |
| hexagonal nut, M2                                   | 100  | reichelt | SK M2        | 1.81 | 1.81 |
| bolt, M2, 20 mm                                     | 100  | reichelt | SZK M2X20    | 7.90 | 7.90 |
| bolt, M3, 10 mm                                     | 100  | reichelt | SZK M3X10    | 1.60 | 1.60 |
| bolt, M3, 25 mm                                     | 100  | reichelt | SZK M3X25    | 2.27 | 2.27 |
| bolt, M3, 35 mm                                     | 100  | reichelt | SZK M3X35    | 3.78 | 3.78 |
| plain washer, 3.2 mm                                | 100  | reichelt | SKU 3,2      | 0.92 | 0.92 |
| isolated copper wire, 0.14 mm <sup>2</sup> , yellow | 20 m | reichelt | LITZE GE     | 1.28 | 1.28 |
| isolated copper wire, 0.14 mm <sup>2</sup> , red    | 20 m | reichelt | LITZE RT     | 1.28 | 1.28 |
| isolated copper wire, 0.14 mm <sup>2</sup> , black  | 20 m | reichelt | LITZE SW     | 1.31 | 1.31 |
| USB-A to USB-B 2.0 cable                            | 5 m  | reichelt | DELOCK 83896 | 3.31 | 3.31 |

\*The reported part numbers and prices are from German suppliers in 2017.

Equipment necessary for soldering, drilling holes and making threads are not listed.



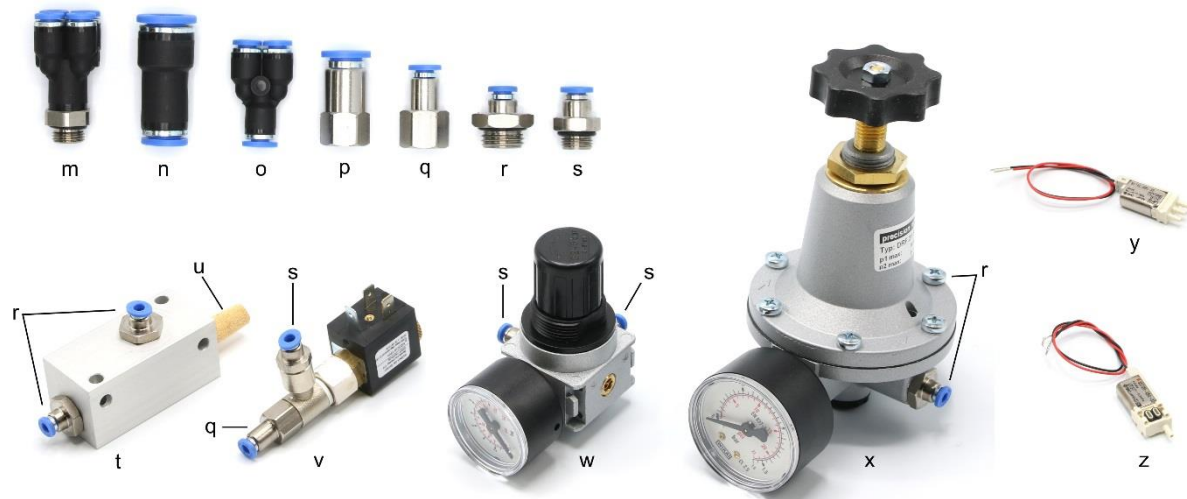

| #        | Pneumatic parts                                                                   | Amount | Supplier/<br>Producer* | Part number* | Unit<br>cost €* | Total<br>cost €* |
|----------|-----------------------------------------------------------------------------------|--------|------------------------|--------------|-----------------|------------------|
| <b>m</b> | push-in fitting, multiple distributor 4 outlets, G1/8 external thread, 4mm tubing | 1      | Esska                  | IQSQ184G0000 | 3.29            | 3.29             |
| <b>n</b> | push-in reducing connector, 10mm/8mm tubing                                       | 1      | Esska                  | IQSG10800000 | 2.25            | 2.25             |
| <b>o</b> | push-in Y-fitting, 4mm tubing                                                     | 1      | Esska                  | IQSY40000000 | 1.50            | 1.50             |
| <b>p</b> | push-in fitting, G1/8 internal thread, 8mm tubing                                 | 1      | Esska                  | IQSF18800000 | 1.62            | 1.62             |
| <b>q</b> | push-in fitting, G1/8 internal thread, 4mm tubing                                 | 3      | Esska                  | IQSF18400000 | 1.64            | 4.92             |
| <b>r</b> | push-in fitting, G1/4 external thread, 4mm tubing                                 | 6      | Esska                  | IQSG144G0000 | 1.08            | 6.48             |
| <b>s</b> | push-in fitting, G1/8 external thread, 4mm tubing                                 | 7      | Esska                  | IQSG184G0000 | 0.96            | 6.72             |
| <b>t</b> | vacuum ejector                                                                    | 1      | Esska                  | 175811211    | 70.26           | 70.26            |
| <b>u</b> | silencer for vacuum ejector                                                       | 1      | Esska                  | SD14MS000000 | 1.06            | 1.06             |
| <b>v</b> | 2/2 solenoid valve                                                                | 3      | Esska                  | 8552MZ12V000 | 32.14           | 96.42            |
| <b>w</b> | pressure regulator, 1-10 bar                                                      | 2      | Esska                  | R018-6000000 | 29.85           | 59.70            |
| <b>x</b> | precision pressure regulator, 10-1000 mbar                                        | 2      | Esska                  | DRF31GS00000 | 68.38           | 136.76           |
| <b>y</b> | 3/2 solenoid valve, body ported                                                   | 12     | SMC                    | S070C-6BG-32 | 38.04           | 456.48           |
| <b>z</b> | 3/2 solenoid valve, body ported manifold                                          | 20     | SMC                    | S070M-6BG-32 | 34.06           | 681.20           |
|          | U end plate assembly                                                              | 2      | SMC                    | SS070M01-2A  | 14.85           | 29.70            |
|          | d end plate assembly                                                              | 2      | SMC                    | SS070M01-3A  | 14.85           | 29.70            |
|          | PE-tubing 50 m, outer diameter 4 mm, inner diameter 2 mm                          | 1      | Esska                  | 7031PL4X2SCH | 11.72           | 11.72            |
|          | silicone tubing 25 m, outer diameter 4 mm, inner diameter 2 mm                    | 1      | Roth                   | 9559.1       | 20.35           | 20.35            |
| <b>*</b> | thread sealing tape                                                               | 1      | Esska                  | 929500064514 | 1.67            | 1.67             |

\*Use thread sealing tape to seal the connections between push-in fittings (p,q,r,s) the vacuum ejector (t), the 2/2 solenoid valves (v), the pressure regulators (w, x) and the multiple distributor (m).

## Layout of acrylic sheet

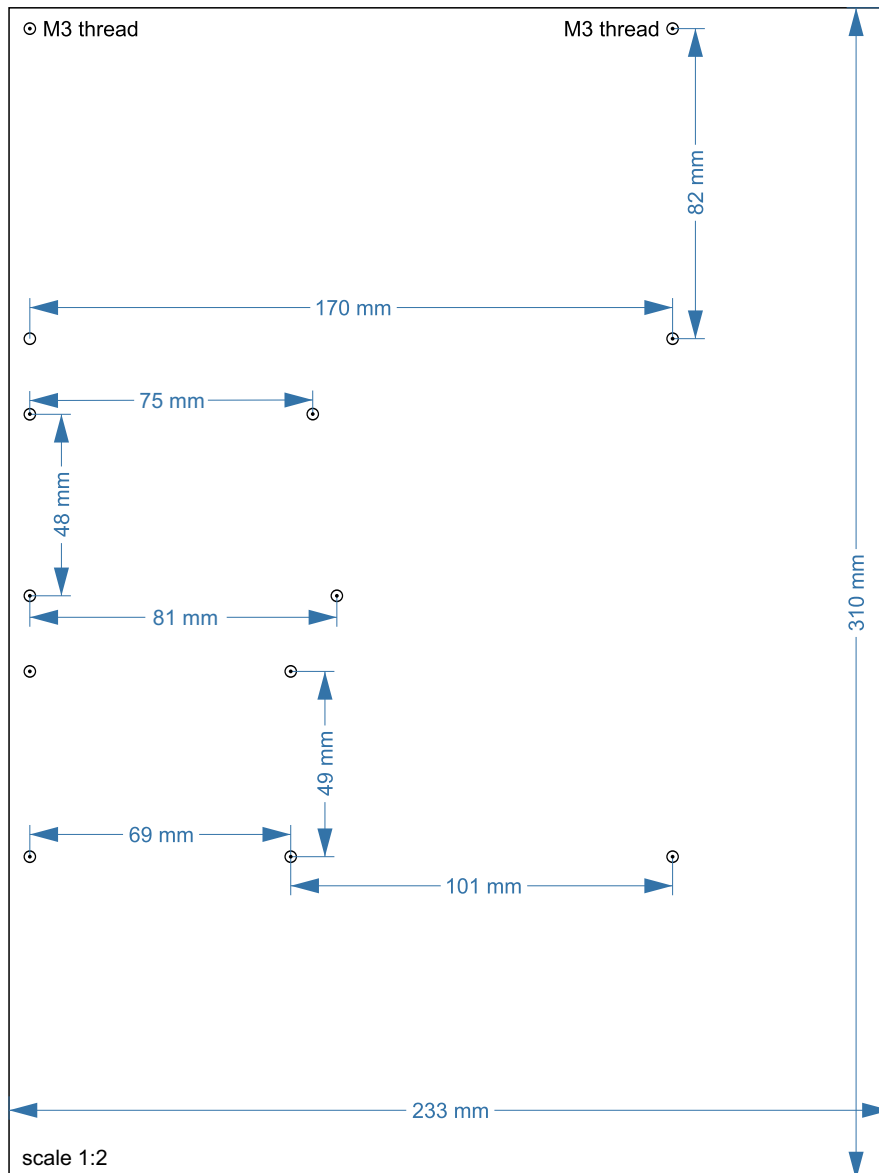

Layout of lower acrylic sheet with 10 mm thickness. Circles with central dot indicate positions where a M3 thread needs to be cut (first drill hole with a diameter of 2.5 mm). The scale is 1:2, a 1:1 enlarged layout could serve as a printed template.

## Layout of acrylic sheet and angle

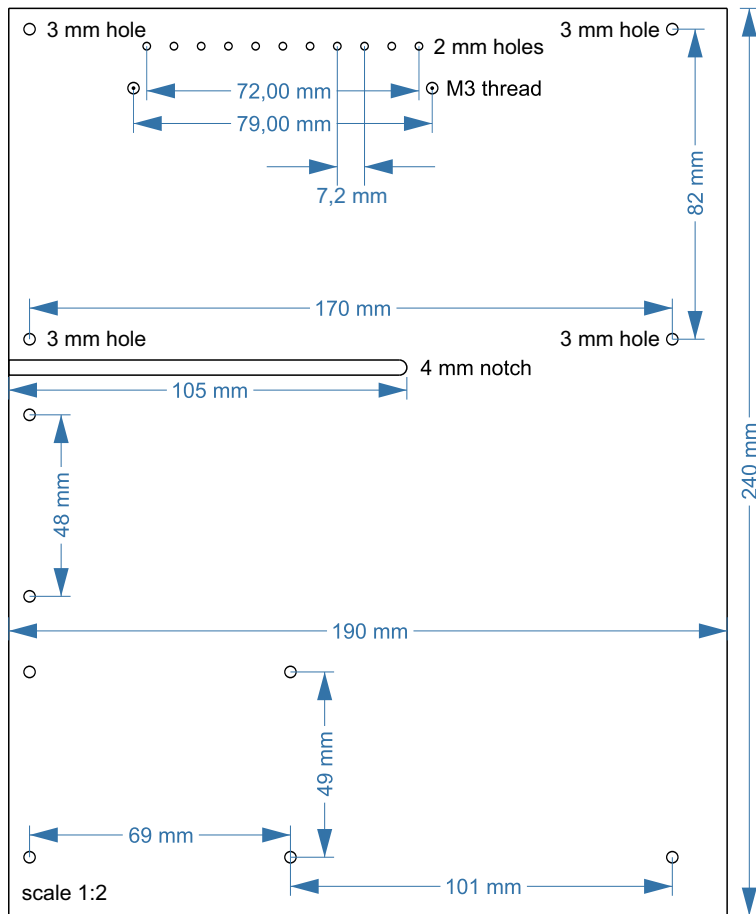

Layout of upper acrylic sheet with 5 mm thickness. Cut 2 x M3 threads at circles with central dot (first drill 2.5 mm holes). Drill 11 x 2 mm holes, each 7,2 mm apart. All other circles indicate 3 mm holes. A 4 mm notch will allow for passage of cables. The scale is 1:2, a 1:1 enlarged layout could serve as a printed template.

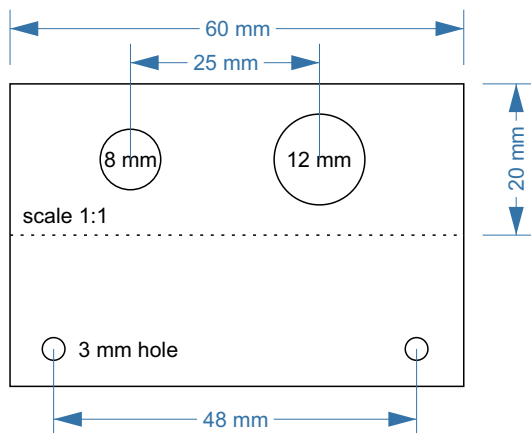

Layout of upper acrylic sheet with 5 mm thickness. Cut 2 x M3 threads at circles with central dot (first drill 2.5 mm holes). Drill 11 x 2 mm holes, each 7,2 mm apart. All other circles indicate 3 mm holes. A 4 mm notch will allow for passage of cables. The scale is 1:2, a 1:1 enlarged layout could serve as a printed template.

## Assembly guide for pressure control device

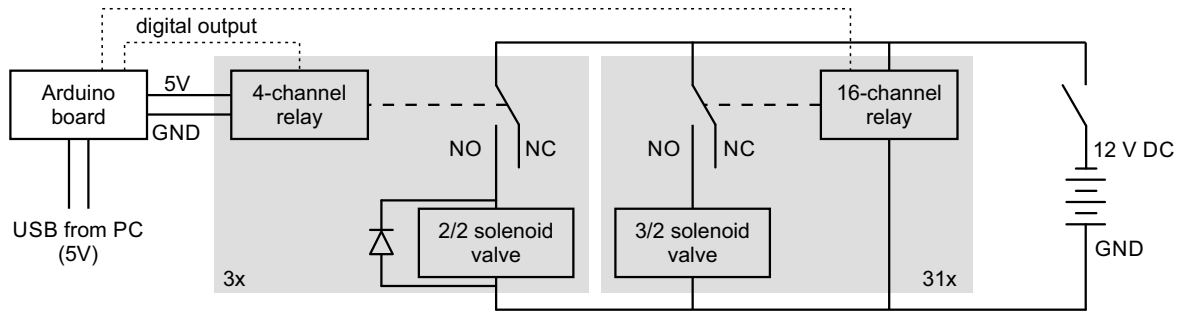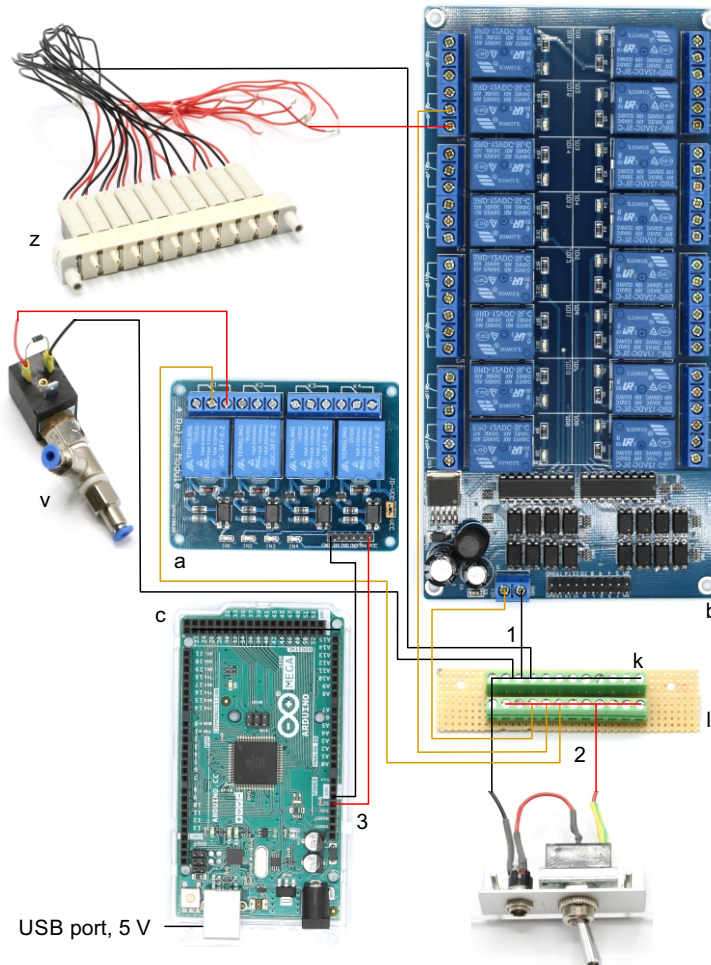

### Top: Electrical circuit wiring diagram for valves, relays and Arduino board.

This wiring diagram shows that all solenoid valves (z, v) and the two 16-channel relay board (b) are powered through the 12 V DC power supply (80 W, 12 V / 6,67 A). The 4-channel relay is powered through the Arduino board which receives a 5 V power supply from the USB cable. The grey boxes indicate that this circuit is replicated for each valve in parallel. The relays receive digital signals from the Arduino boards (dotted lines) and switch the contacts from NC (normally closed) to NO (normally open) which brings the solenoid valve into a different state. A flyback diode is necessary for the 2/2 solenoid valves to protect from voltage spikes.

### Bottom: Photographic wiring scheme of circuit.

1. Ground conductor is connected to all black lines through the soldered screw terminal block on the stripboard (k, l).
2. The 12 V conductor (red) is connected to all yellow lines through the other soldered screw terminal block. These yellow wires carry 12 V to power the 16-channel relay board (b), the individual 3/2 solenoid valves (z) and the 2/2 solenoid valves (v).
3. The 4-channel relay board (a) is powered through the 5 V output pin of the Arduino board (c) which is supplied through the USB-cable from the PC.

## Assembly guide for pressure control device

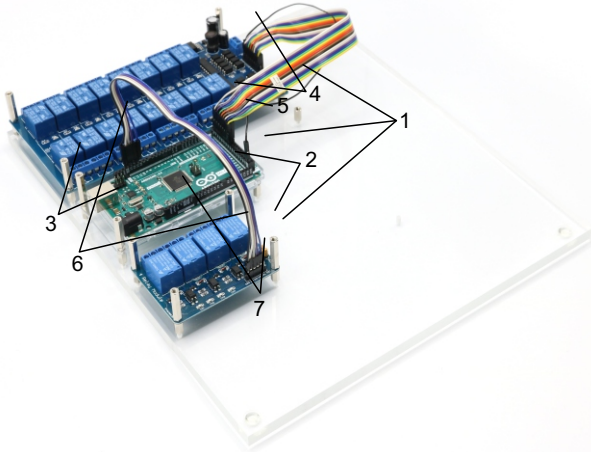

0. Prepare the acrylic sheets.
1. Screw in 10 mm metal spacers (h) in M3 threads of the base plate.
2. Place 16-channel relay (b), 4-channel relay (a) and Arduino Mega (c) on the corresponding positions and fix them with the 25 mm metal spacers (i).
3. The Arduino only needs 2x 25 mm spacers to fix it.
4. Connect the input pins of the 16-channel relay with digital outputs of the Arduino (e.g. 22-37) using the jumper wire (d) and document the corresponding pin numbers.
5. Connect the ground pins of the 16-channel relay and the Arduino.
6. Connect the input pins of the 4-channel relay with digital outputs of the Arduino (e.g. 10-13) and document the corresponding pin numbers. Also connect the ground pins.
7. Connect the 5V power pin of the Arduino with the VCC pin of the 4-channel relay to power it (cable not shown in picture).

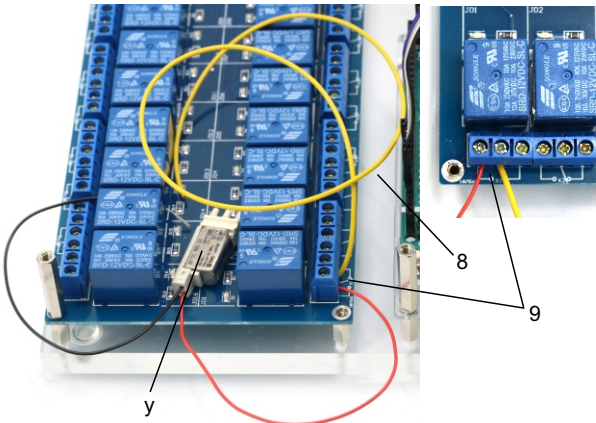

8. Cut 31 yellow isolated copper wires at a length of 15 cm each and strip the ends of the cables.
9. Connect the non-manifold 3/2 solenoid valve (y, S070C-6BG-32) to a relay on the 16-channel relay by connecting the red cable to the normally open contact and connecting the yellow cable to the common contact.

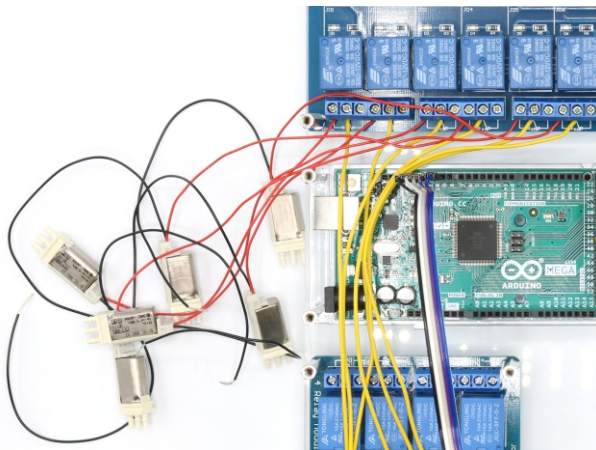

10. Repeat step 9 with all 11 non-manifold 3/2 solenoid valves (y, S070C-6BG-32). Document which relay is connected to each solenoid valve. This will be important for the programmed control of each valve in the Matlab code.

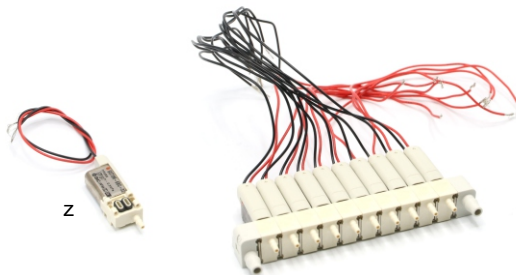

11. Assemble two arrays of 10 manifold 3/2 solenoid valves (z, S070M-6BG-32) as described in the product information.



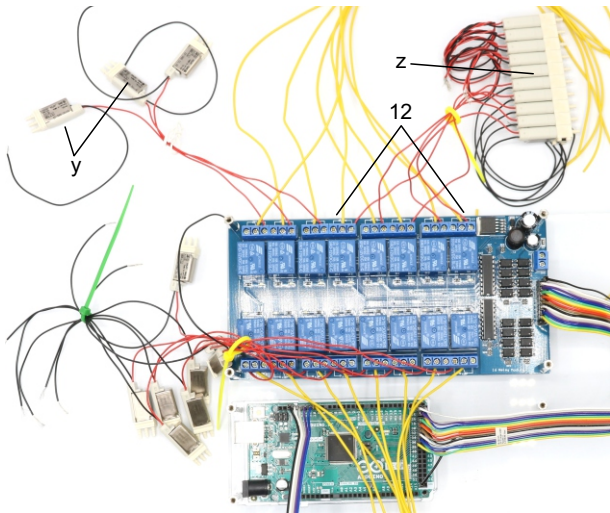

12. Connect 5 manifold 3/2 solenoid valves (z, S070M-6BG-32) to the remaining relays on the 16-channel relay. Connect the red cable to the normally open contact and the yellow cable to the common contact. Document which relay is connected to each solenoid valve.

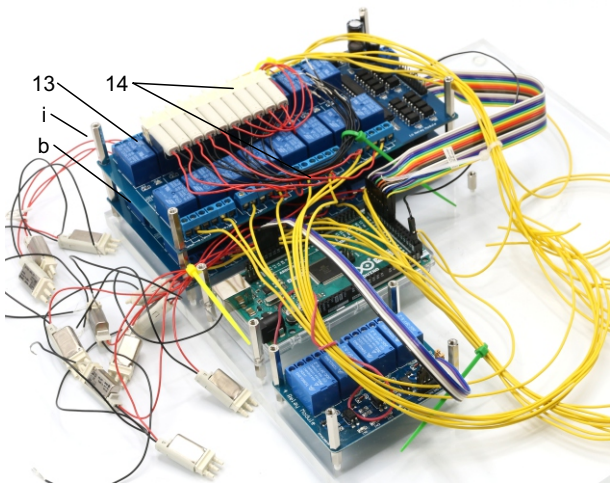

13. Attach the second 16-channel relay (b) on top of the other 16-channel relay and fix it with 25 mm spacers (i)
14. Join remaining 5 manifold 3/2 solenoid valves (z, S070M-6BG-32) of the first assembled array with relays of the top 16-channel relay by connecting the red cable to the normally open contact. Connect a yellow cable to the common contact of every relay.

Document which relay is connected to each solenoid valve. Pay special attention to order of connections. Intersections of red cables should be avoided. The valve manifold will be oriented as shown in the picture.

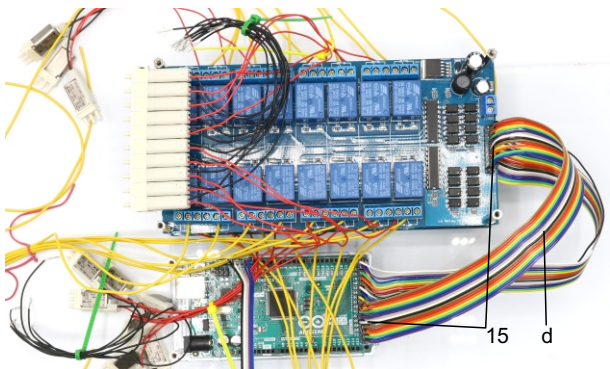

15. Connect the input pins of the top 16-channel relay with digital outputs of the Arduino (e.g. 38-53) using the jumper wire (d) and document the corresponding pin numbers. Connect the ground pins of the 16-channel relay and the Arduino.

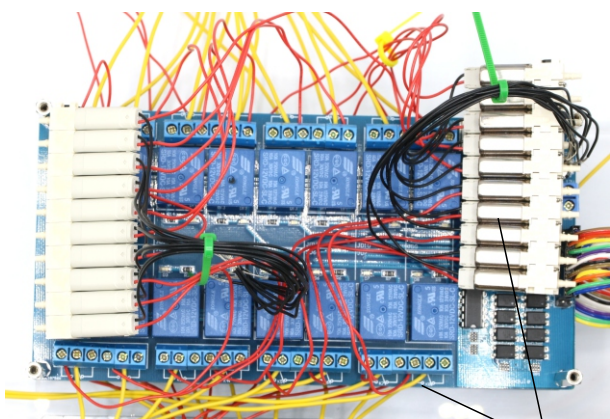

16. Assemble second array of ten manifold 3/2 solenoid valves (z, S070M-6BG-32) and connect these to relays of the top 16-channel relay by connecting the red cable to the normally open contact. Document which relay is connected to each solenoid valve.

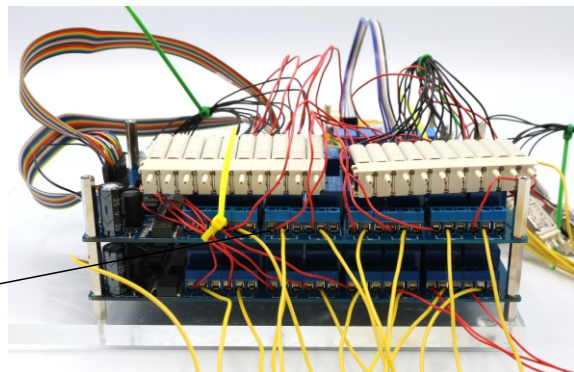



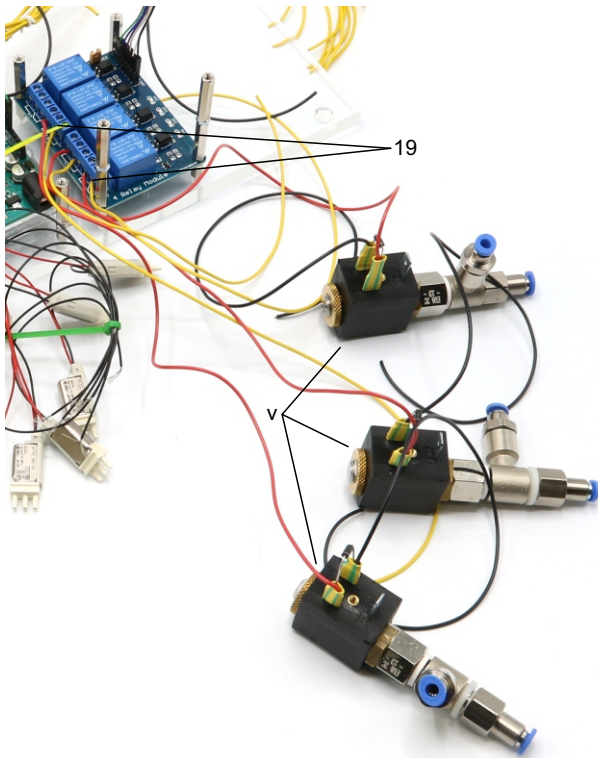

17. Solder red and black wires (approx. 10 cm) to contacts of 3x 2/2 solenoid valves (v).
18. Include a diode (1N4007) between the contacts to avoid current from capacitor discharge damaging the remaining circuit.
19. Connect 2/2 solenoid valves to the 4-channel relay. Connect the red cable to the normally open contact and a yellow cable (approx. 10 cm) to the common contact. Document which relay is connected to each solenoid valve.
20. Screw on push-in fittings (s, q) onto the 2/2 solenoid valves.

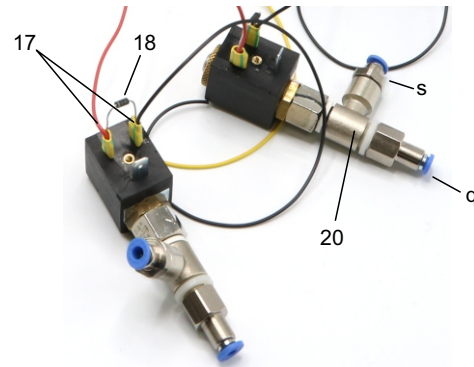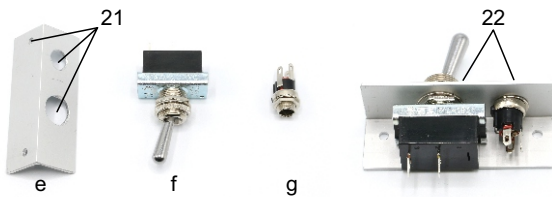

21. Drill holes (3, 8, 12 mm) in aluminium angle (e) as shown on the layout.
22. Attach the toggle switch (f) to the 12 mm hole and the DC barrel power connector (g) to the 8 mm hole.
23. Solder a black wire (approx. 10 cm) to the neutral conductor of the power connector. This wire will connect to all ground wires (black wires) of the valves and relays.
24. Solder a red wire to the DC conductor of the power connector and to a contact of the ON/OFF switch.
25. Solder another red wire (approx. 10 cm) to the other contact of the toggle switch. This wire will conduct 12V for all valves and relays (yellow wires).

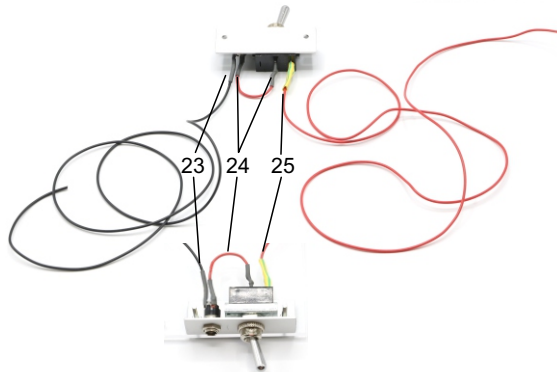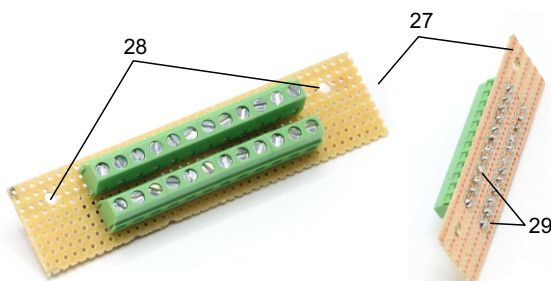

27. Cut the stripboard to a 25x95 mm rectangle with longitudinal orientation of the conducting strips.
28. Drill two 3 mm holes, 82 mm apart and 7 mm away from the edge. This stripboard will be fixed onto the top acrylic plate above the 16-channel relays.
29. Solder both screw terminal blocks (k) onto the stripboard so that all contacts of one block are connected.

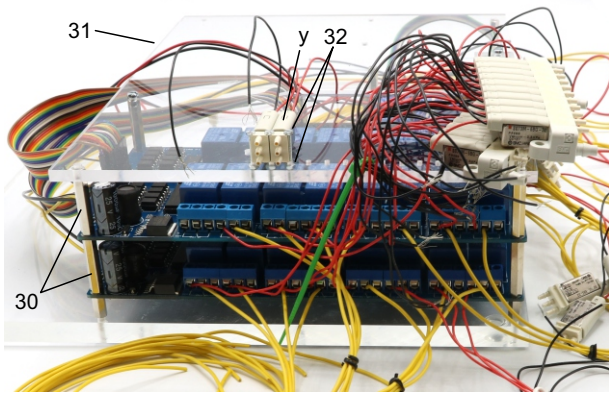

30. Screw in second 25 mm metal spacer (i) on top of all metal spacers to create level pillars of metal spacers for the upper acrylic plate.
31. Mount upper acrylic plate (5 mm) on top of the 25 mm metal spacers (i).
32. Use 20 mm M2 bolts to attach the non-manifold 3/2 solenoid valves (y) at the location of the 2 mm holes on the upper acrylic plate. Use M2 nuts below the acrylic plate to fix the valves.

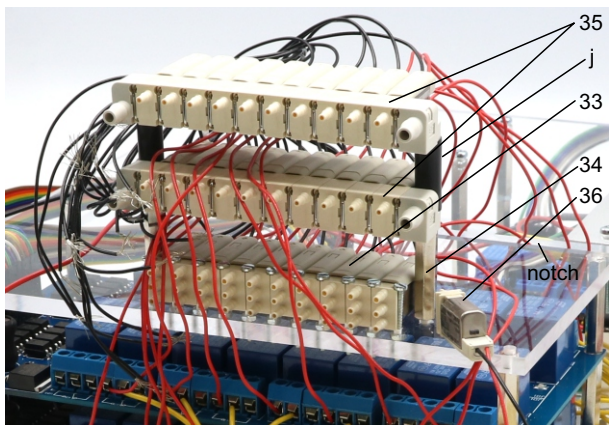

33. Repeat step 32 for 10 of the 11 non-manifold 3/2 solenoid valves (z). Document position of each valve, their respective relay and connected Arduino digital output pin.
34. Screw in two 25 mm metal spacers (i) next to the first level of non-manifold solenoid valves.
35. Attach the other two solenoid valve manifolds (z) on top of the metal spacers separated by 20 mm plastic spacers (j) and fixed using 35 mm M3 bolts. Pay attention to avoid twisting of the cables. Route the cables either through the notch or around the upper plate.
36. The 11. non-manifold solenoid valve is later attached on the top plate.

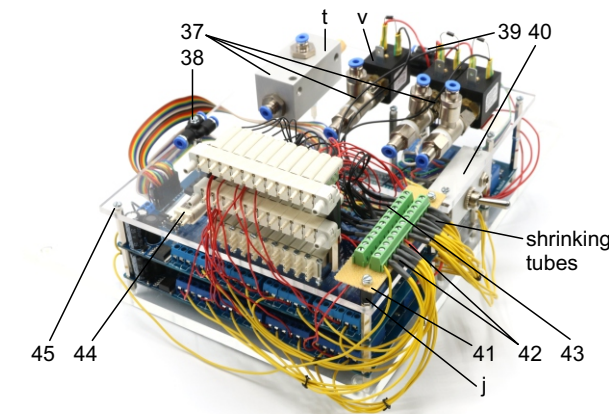

37. Attach vacuum ejector (t), equipped with G1/4 push-in fittings (r) and silencer (u), and three 2/2 solenoid valves (v), equipped with G1/8 push-in fittings (s, q), onto the top plate using double-sided adhesive tape.
38. Use 25 mm M3 bolt to attach the push-in Y-fitting (o).
39. Use 35 mm M3 bolt to attach the multiple distributor with 4 outlets (m, p).
40. Attach the angle with toggle switch and DC power connector (step 21-25) underneath the top acrylic plate, above the Arduino and use M3 bolts to fix it.
41. Attach the cut stripboard with soldered screw terminal blocks (step 27-29) to the top plate using two 25 mm M3 bolts and two 10 mm plastic spacers (j).
42. Connect all yellow wires from the relays and the 16-channel relay boards to one screw terminal block which also connects the red 12V phase conductor from the toggle switch (step 25). This distributes the 12V power from the DC power connector to the relays and thereby to the solenoid valves through the red wires.
43. Connect all black neutral wires from the solenoid valves and the 16-channel relay boards to the other screw terminal block which is also connected with the black neutral conductor wire from the DC power connector (step 23).
44. Use double-sided adhesive tape to attach the 11. non-manifold solenoid valve (step 36) onto the top plate, adjacent to other 3/2 solenoid valves.
45. Use 10 mm M3 bolts on remaining holes.

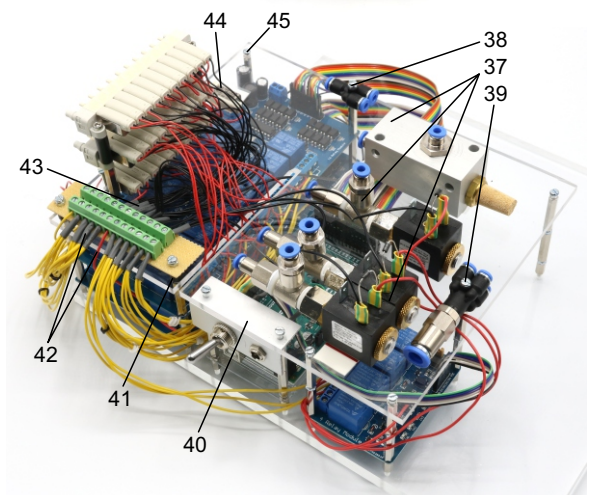



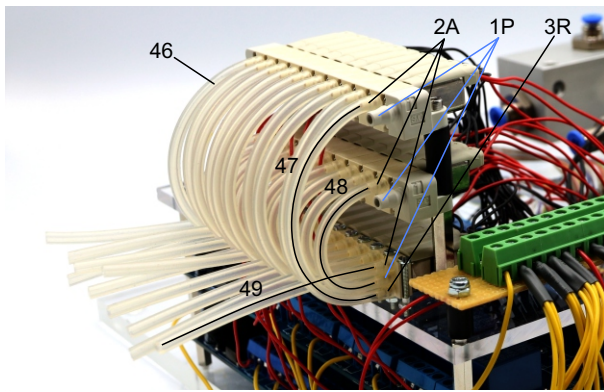

The following steps connects the 3/2 valves to enable application of different pressures to individual pipette holders. For schematic depiction, please see respective figure.

46. Cut 10 silicon tubes (diameter 2/4 mm) with a length of 9.5 cm, 10 silicon tubes with a length of 6 cm and 10 silicon tubes with a length of 8 cm.
47. Connect one end of the 9.5 cm tubes to the 2A nozzle of the top level valves and the other end to the lower 3R nozzle of the respective first level valves.
48. Connect one end of the 6 cm silicon tubes to the 2A nozzle of the second level valves and the other end to the middle 1P nozzle of the respective first level valves.
49. Connect one end of the 8 cm tubes to the top 2A outlets of the first level valves. The other end can be connected to tubes that directly connect to the respective pipette holders.

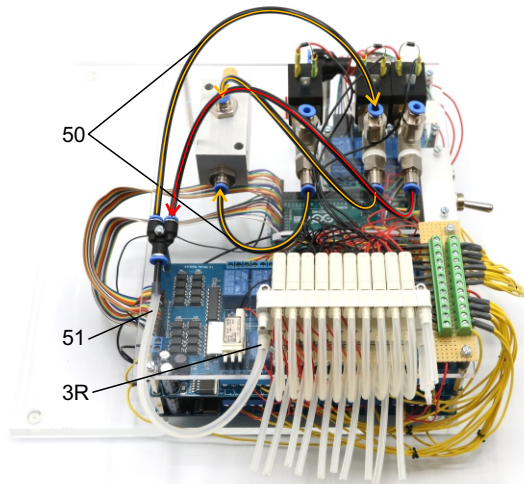

The following steps connects the 2/2 valves and vacuum ejector to the 3/2 valve manifolds to generate the necessary pressures for the cleaning procedure. The tubes highlighted in red transfer the 1 bar positive pressure. The tubes highlighted in yellow transfer the negative pressure for suction. Arrowheads indicate direction of air flow.

50. Connect the PE-tubes (outer diameter 4 mm, inner diameter 2 mm) as shown between the 2/2 valves and the vacuum ejector. Connect these to the Y-fitting.
51. Connect the Y-fitting to the 3R nozzle of the second level 3/2 valve manifold through a silicone tube (diameter 4/6 mm).

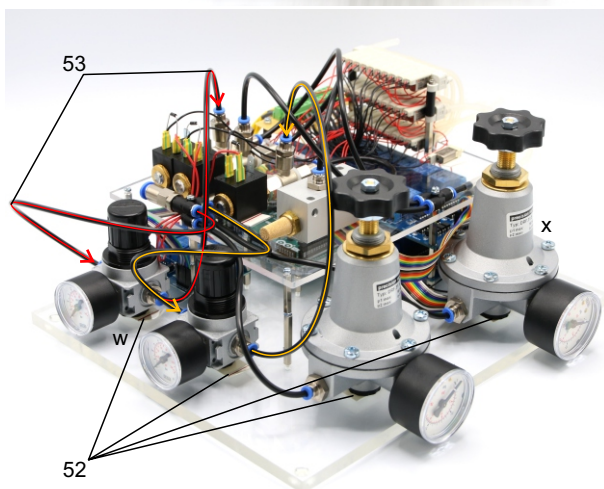

The following steps connect the 1-10 bar pressure regulators (w) to the pressurized air supply and the 2/2 solenoid valves.

52. Position the pressure regulators (w, x) on the base plate and fix them using double sided adhesive tape. We found this to be of sufficient stability. Pay special attention to the intended direction of air flow depicted on the regulators.
53. Connect the PE-tubes to the multiple distributor with 4 outlets and to the 1-10 bar pressure regulators (w). Then connect those to the 2/2 solenoid valves as depicted. Meaning of colour code and arrowheads correspond to the previous steps.

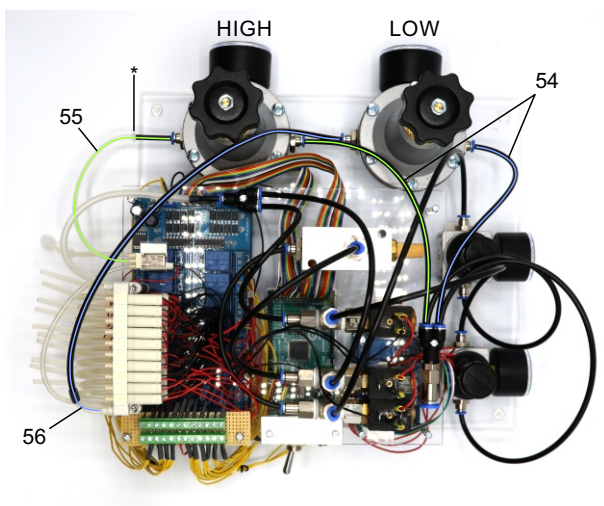

The following steps connect the precision pressure regulators (x, 10-1000 mbar) to the valve manifold to generate HIGH pressure (70 mbar, green lines) and LOW pressure (20 mbar, blue lines).

54. Connect 2 PE-tubes to the multiple distributor with 4 outlets and each to one of the precision regulators. Pay special attention to intended direction of airflow on the regulators. Arrowheads indicate direction of air flow.
55. Connect the HIGH pressure regulator (set to 70 mbar) to the middle nozzle of the single 3/2 solenoid valve which is attached to the acrylic plate (green line). Connect the PE-tubing with a 2/4 mm silicone tube using a mini tubing connector(\*).
56. Connect the LOW pressure regulator (set to 20mbar) to the 1P nozzle of the top level 3/2 valve manifold. Use a 4/6 mm silicone tube to connect the PE-tubing with the nozzle.

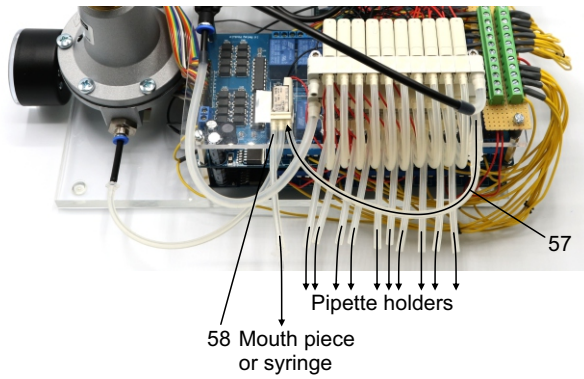

57. Connect the 1P nozzle of the second level solenoid valve manifold to the 3R nozzle of the single 3/2 solenoid valve. Use a 4/6 mm silicone tube to connect the 1P nozzle of the manifold. Connect it with a 2/4 mm silicone tube using a mini tubing reducer.
58. Connect a 2/4 mm silicone tube to the 2A nozzle of the single 3/2 solenoid valve which can be connected to a mouth piece or a syringe for applying pressure during membrane sealing and breakthrough.

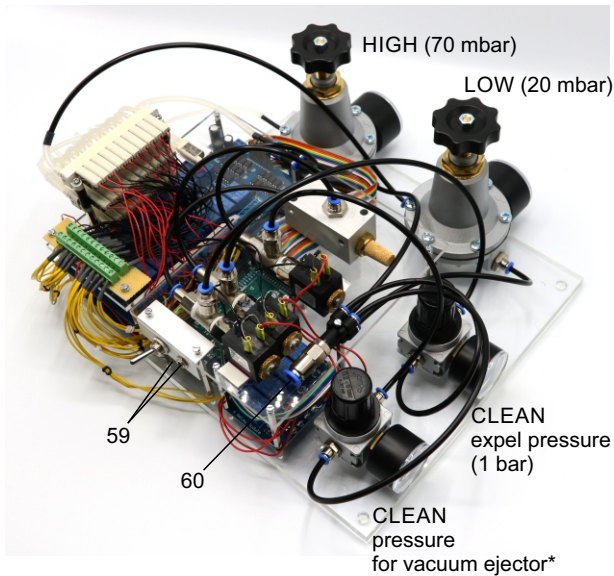

59. Plug in the power supply (12 V / 6.67 A, 80 W) and the USB-cable to the Arduino board.
60. Connect to pressurised air supply using a PE-tubing with 8 mm outer diameter. The air supply should be set at sufficient high pressures (e.g. 5 bar)

Adjust the regulators manually to the desired pressures.

\*The pressure regulator upstream of the vacuum ejector needs to be adjusted while measuring the negative pressure generated by the vacuum ejector. It should be set at a pressure at which -350 mbar can be applied to the valve manifold (approx. 3-5 bar).

To control the device, you can use the Matlab code and GUI we provided. One could also control the Arduino board using any custom script. Before the first use, please transfer the mapping of the individual valves onto their relay number and respective Arduino digital output pin into the script (see guide to Matlab GUI).

Now the pressure control device is fully operational.

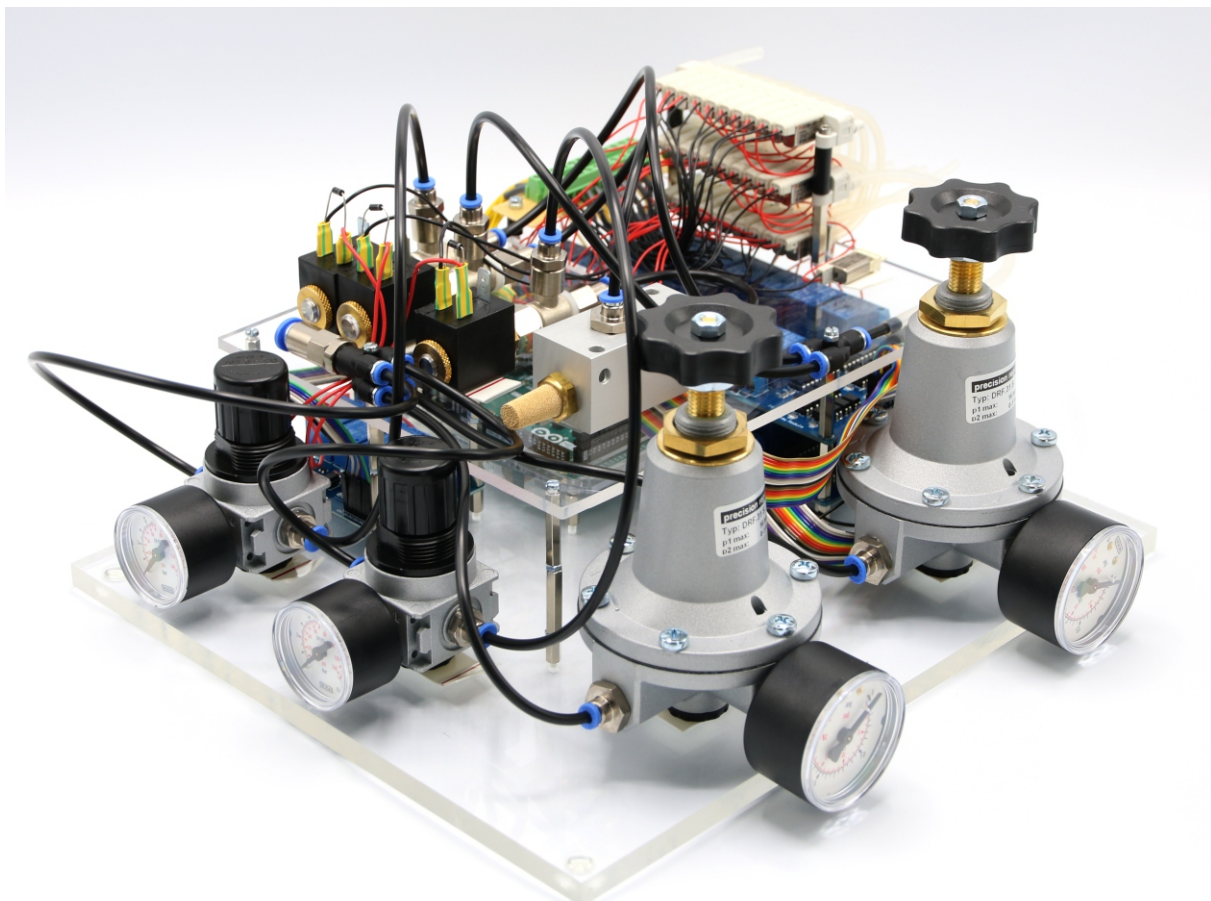



## Matlab code

### GUI instructions

We developed a graphical user interface to control the pressure system and the automated pipette movements. The Matlab code for the pressure system can be downloaded from our Github repository: <https://github.com/neurocharite/multipatch>

For further elaborations regarding the movement algorithms, please see the readme file.

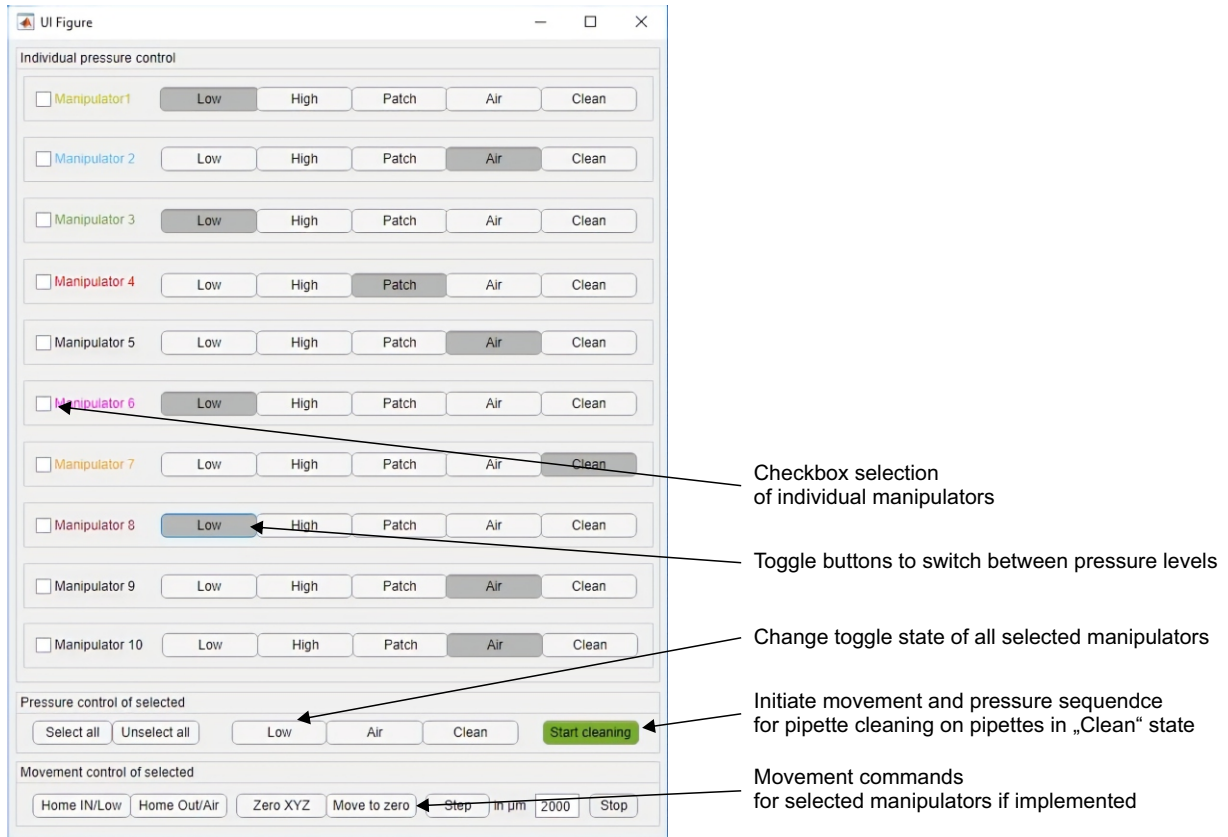

## Pipette positioning algorithm - principle of operation

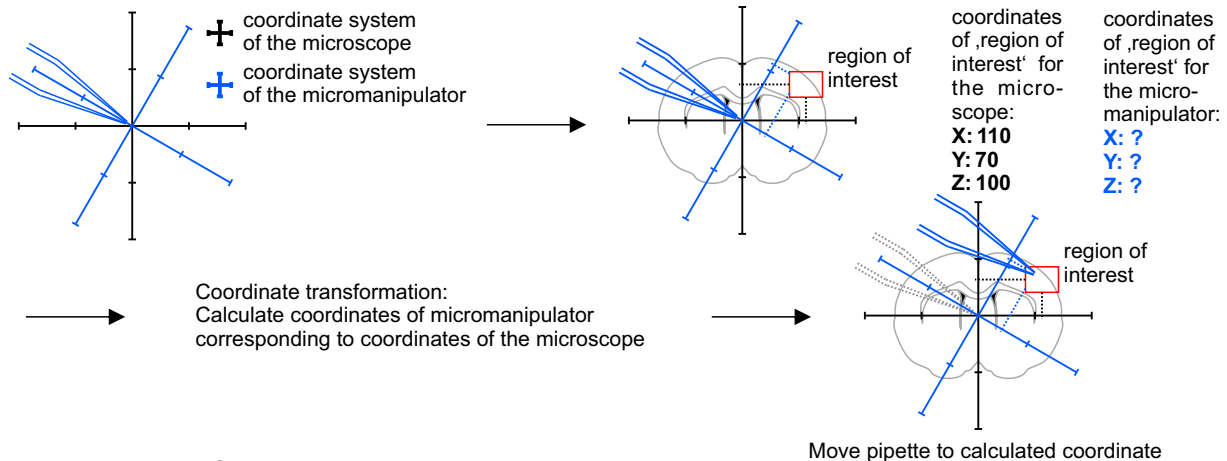

## Application of the algorithm:

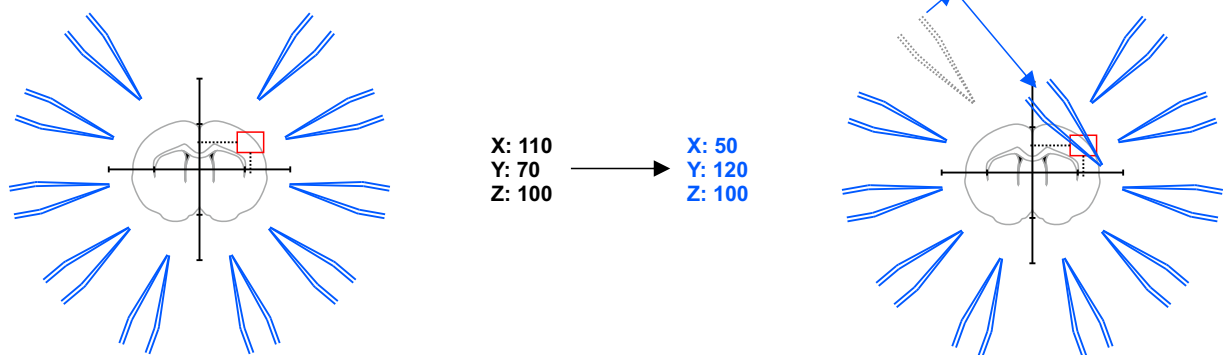

Step 1:  
A brain slice is placed under the microscope. The 'region of interest' is located in the coordinate system of the microscope.

Step 2:  
The coordinates of the 'region of interest' are fed into the pipette finding algorithm. The coordinates for each manipulator are computed.

Step 3:  
Pipette 1 is moved to the calculated coordinate. Manual adjustments are necessary to due variations in pipette shape.

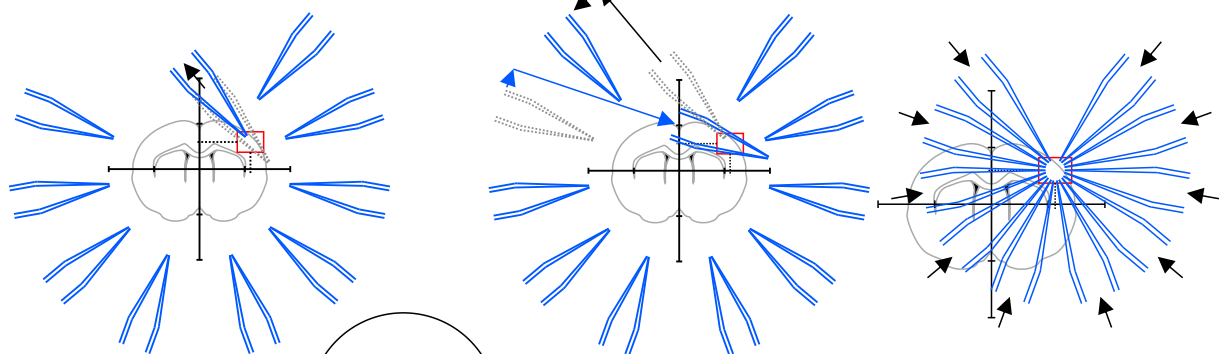

Step 4:  
Pipettes should be moved to a designated corner that will prevent collisions with the other pipettes. This position is then saved.

Step 5:  
The pipette is moved to its starting position while the next pipette is moved to the position calculated by the pipette finding algorithm.

Step 6:  
All pipettes are moved to their target positions simultaneously. All pipettes are now positioned in the region of interest.

Manipulator coordinates were matched to the microscope coordinates using a rotation matrix and anchored to a common reference point. Whenever a new region of interest is determined in the microscope, these coordinates are then entered into the pipette positioning program and the pipette tip is moved into the new field of view by calculating the offset. To prevent collision with the slice, we performed this positioning process approximately 2500  $\mu\text{m}$  above the slice. Small manual adjustments are frequently necessary due to varying length of the pipettes. After the pipette tip is manually moved to its dedicated section of the field of view, this new "IN" position is saved, and the pipette is moved to its initial "OUT" position. Then the next pipette is moved to the calculated target position and the procedure is repeated until all pipettes were assigned new "IN" positions. At the end, all pipettes are moved to their assigned "IN" positions and lowered in the z-axis to roughly 250  $\mu\text{m}$  above the slice surface to prevent effects of the intracellular solution on the slice. Now, individual whole-cell patch-clamp recordings can be established consecutively. This semi-automated approach reduces the risk of breaking the pipette tip and the time needed to complete pipette positioning to 7-9 minutes.



## Construction drawings

### Recording chamber for Scientifica manipulator

all measurements in mm

dotted lines = edges on underside

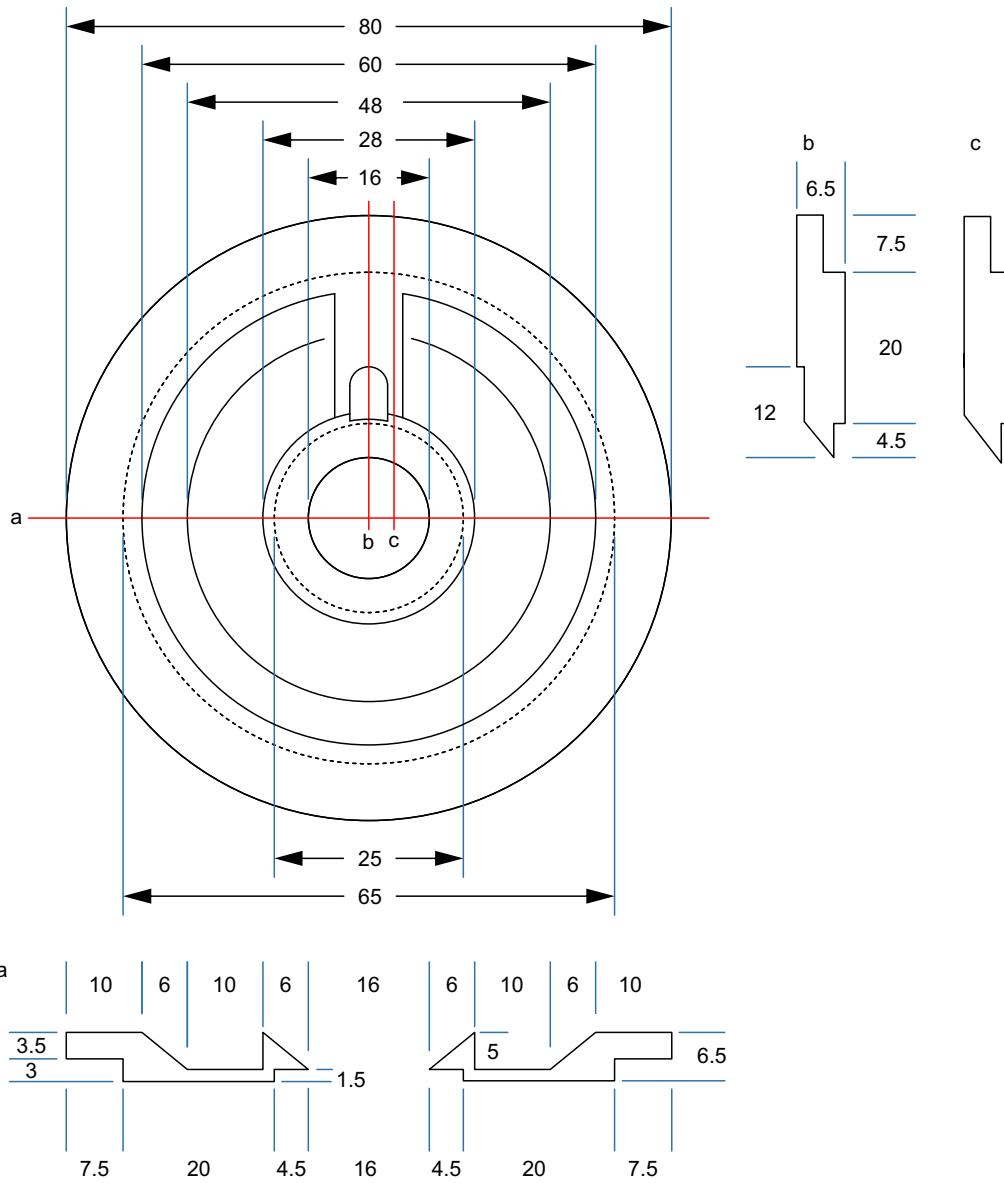

## Recording chamber for Sensapex manipulator

all measurements in mm

dotted lines = edges on underside

Adjustments are needed for Sensapex micromanipulators. Due to a range of motion in the axial axis of 20 mm, the real horizontal range of motion is less than 20 mm. Therefore the central recording well has a smaller diameter.

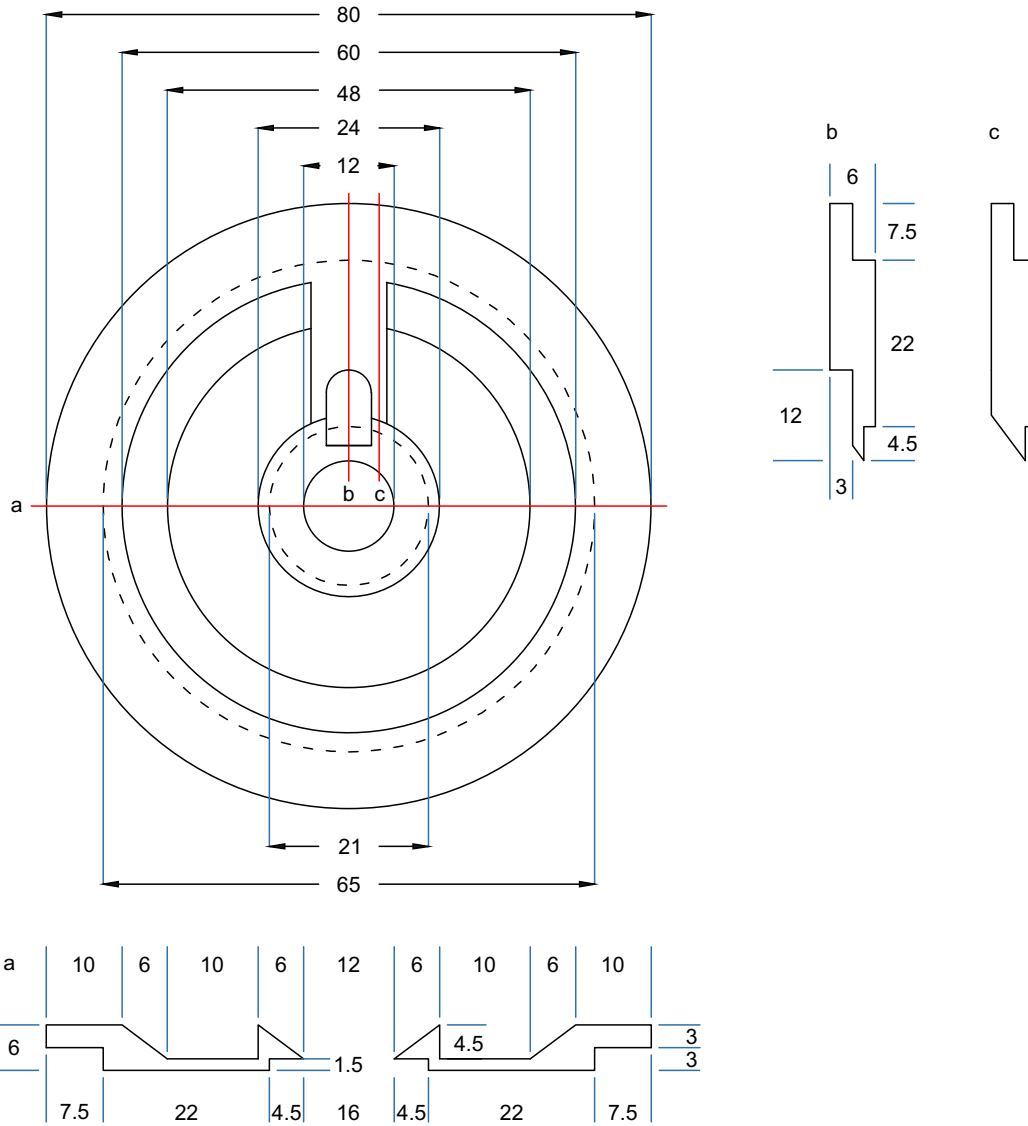

## Custom stage for Sensapex micromanipulator with Nikon Eclipse microscope

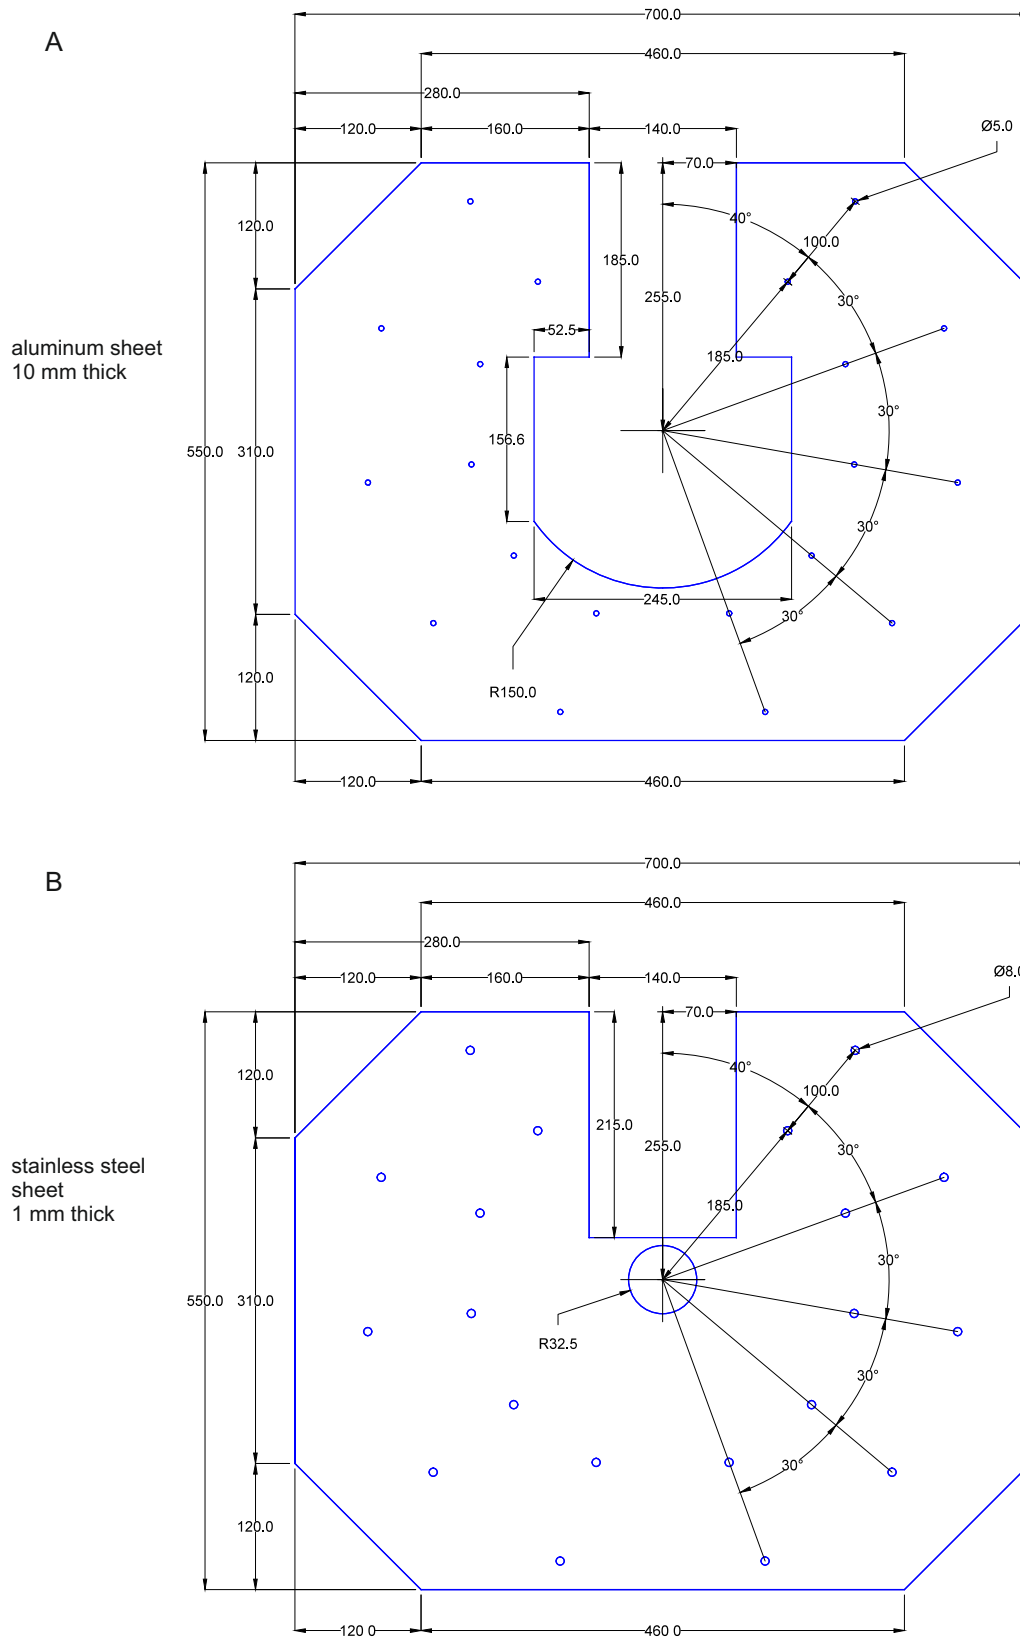

**Supp. Fig. ,Stage construction plan'. A** 10 mm thick sheet of aluminum. The sheet is shown in blue. Measurements are shown in black. All measurements are in millimeters. All drilling-holes are 5 mm in diameter (for M6 ISO metric screw threads). **B** 1 mm thick sheet of stainless steel. The sheet is shown in blue. Measurements are shown in black. All measurements are in millimeters. All holes in the stainless steel sheet are 8 mm in diameter. The two sheets have to be glued together before being mounted into the setup with the stainless steel sheet facing upwards.

## Multi-pipette filling device

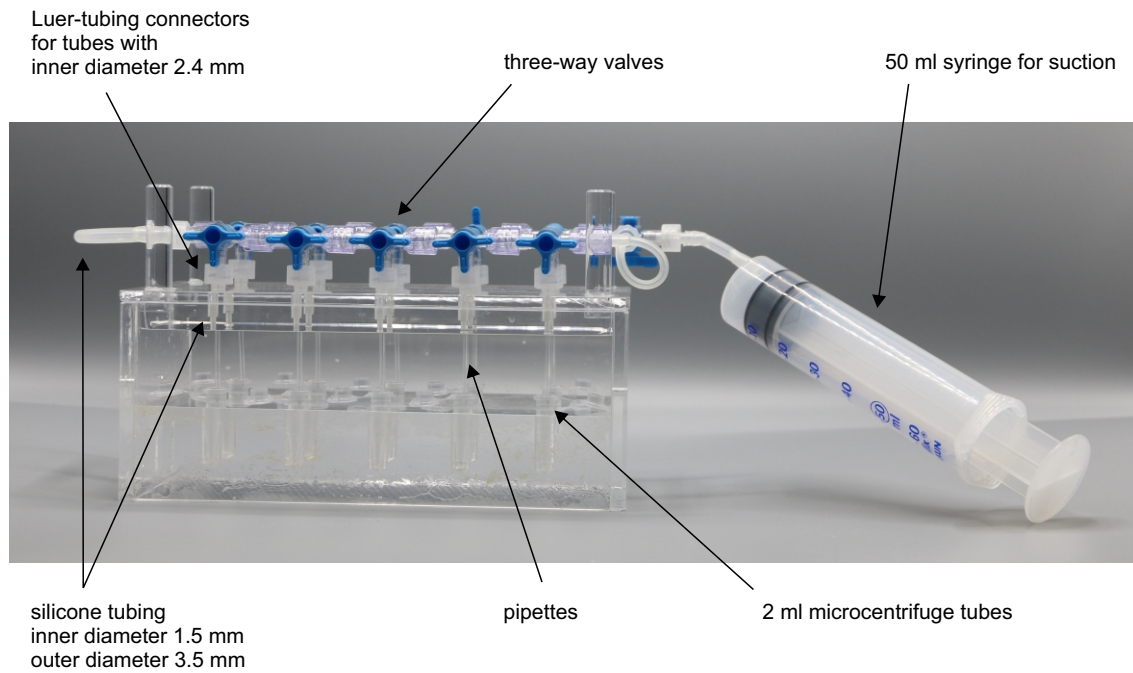

Bottom part

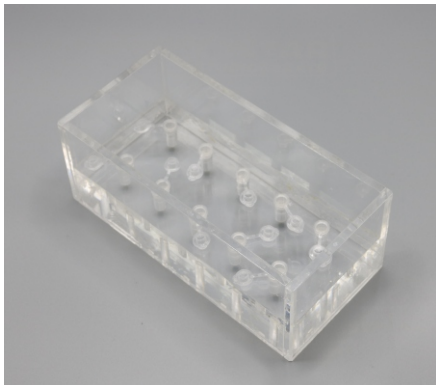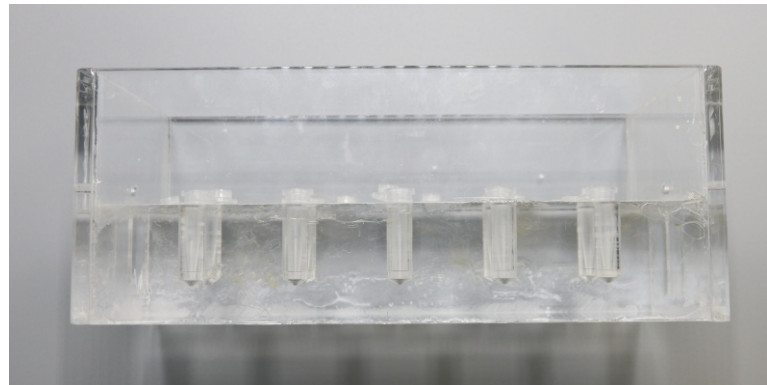

Top part

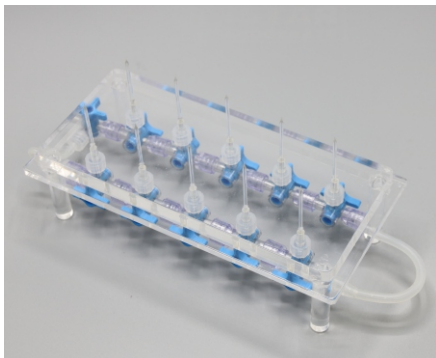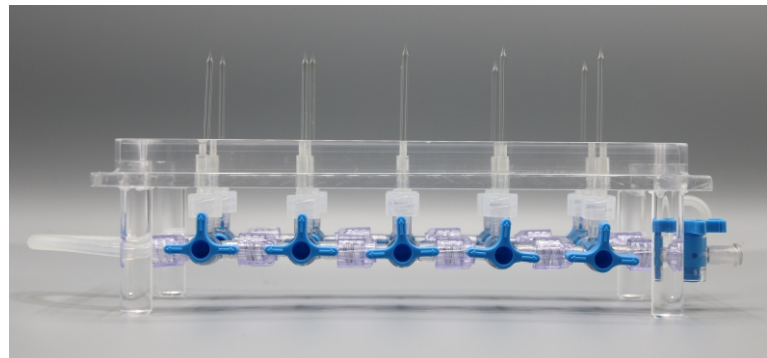

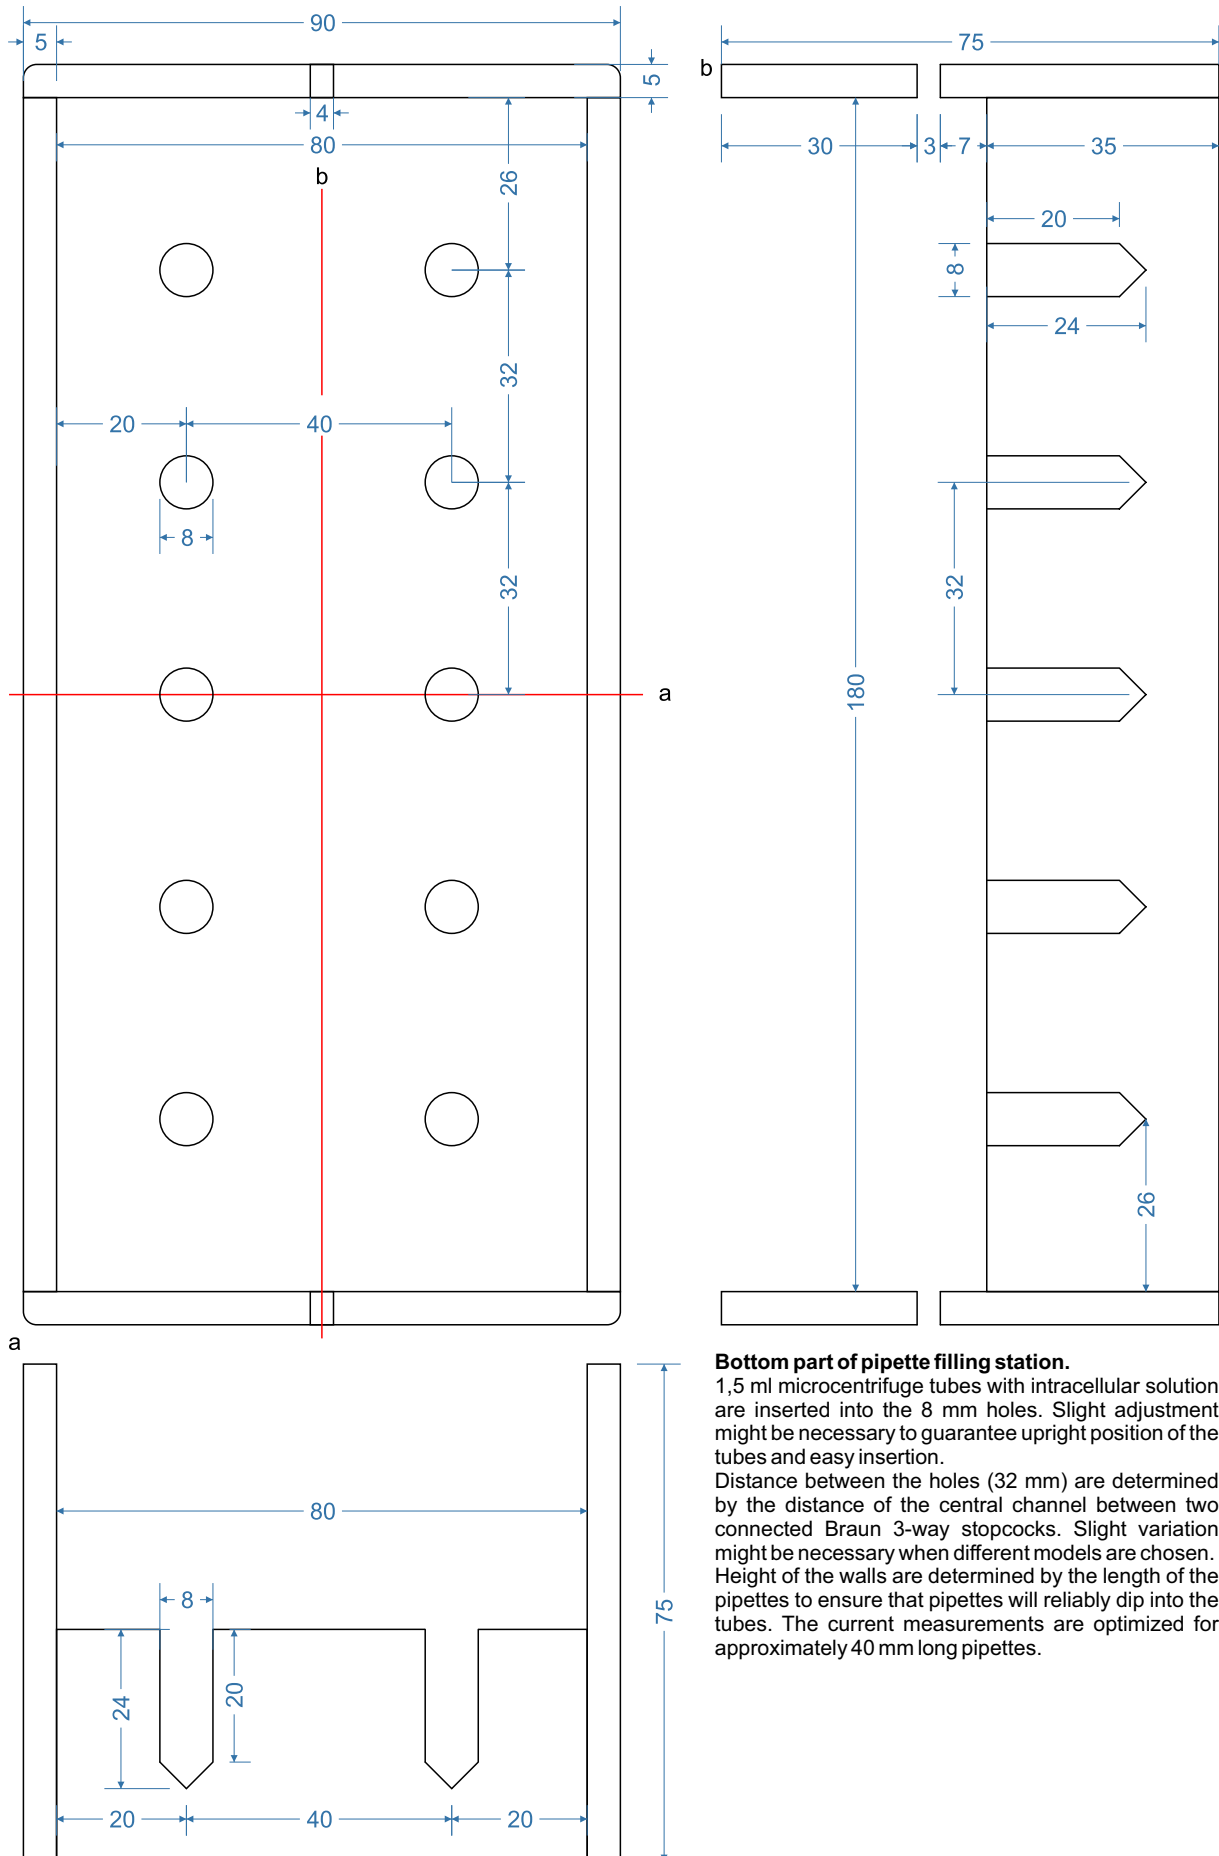

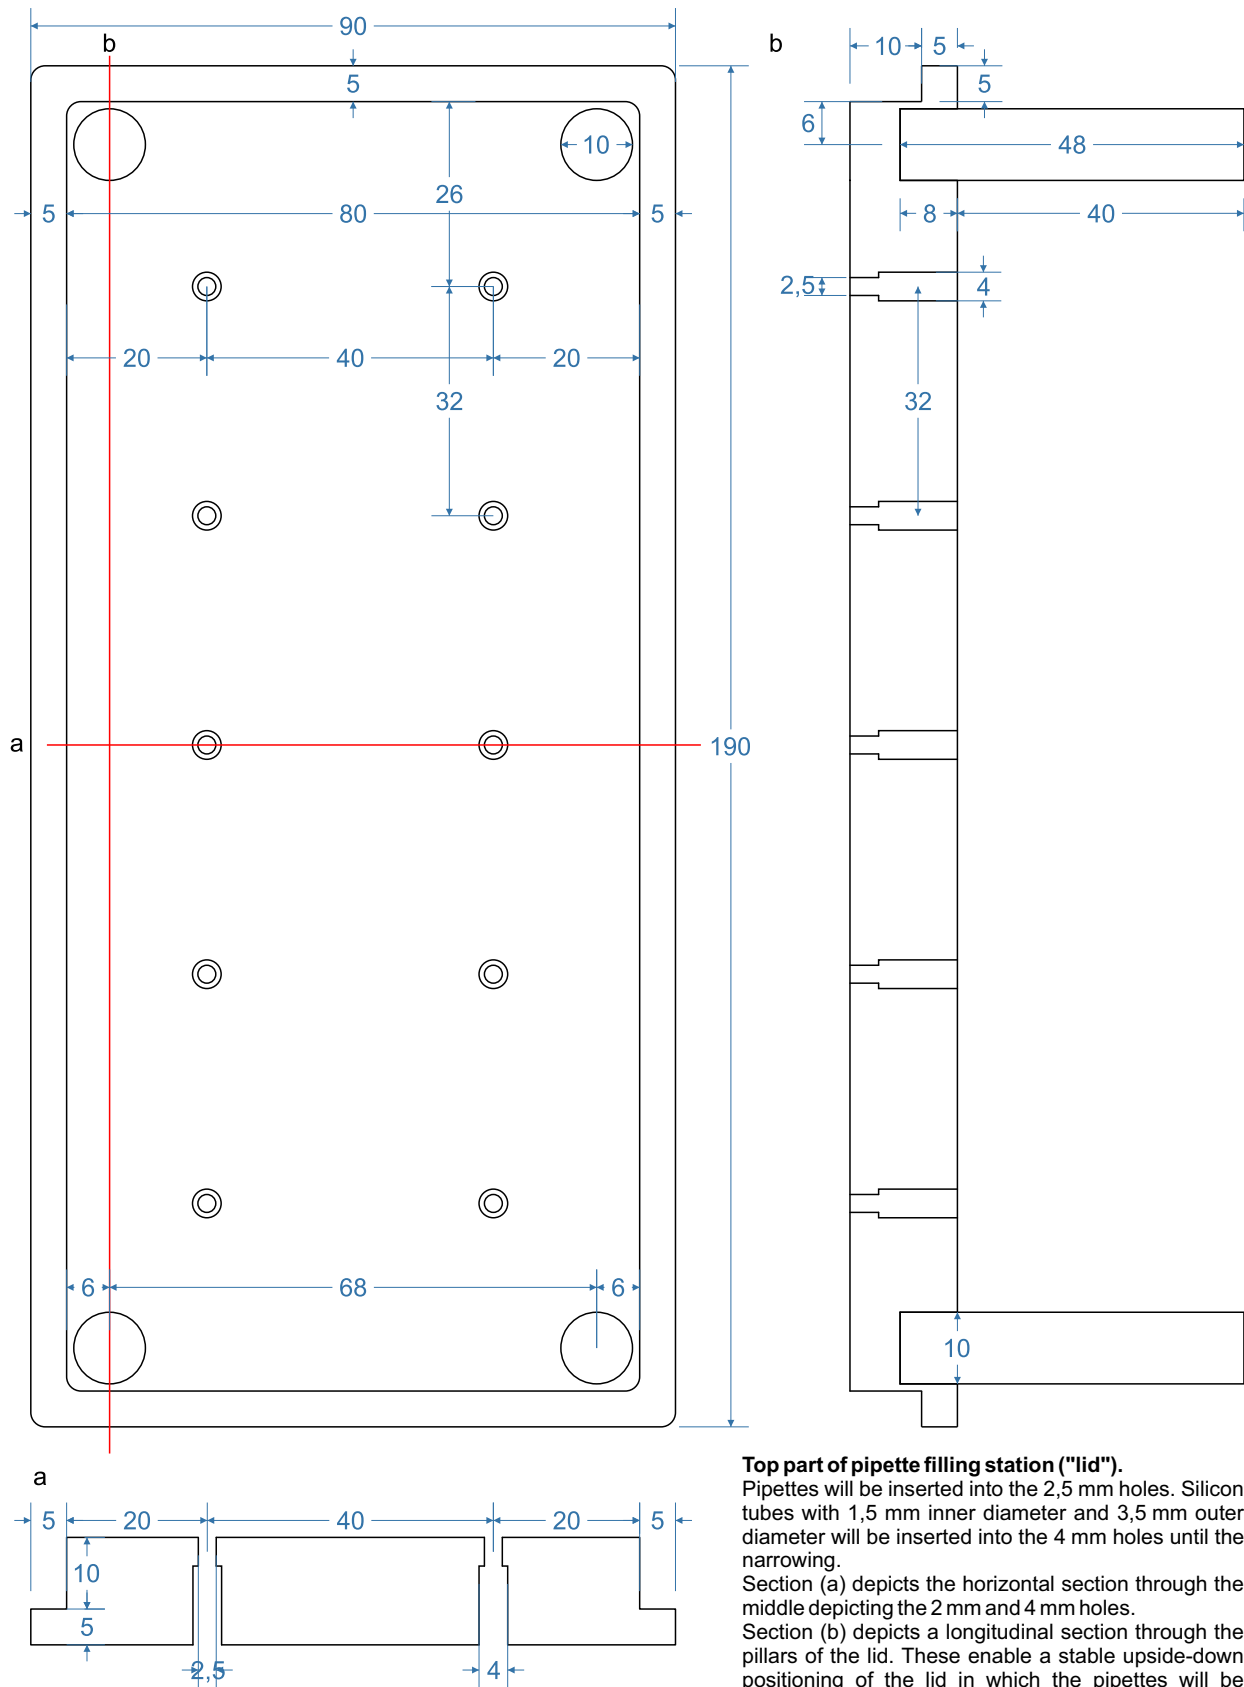

**Top part of pipette filling station ("lid").**

Pipettes will be inserted into the 2,5 mm holes. Silicon tubes with 1,5 mm inner diameter and 3,5 mm outer diameter will be inserted into the 4 mm holes until the narrowing.

Section (a) depicts the horizontal section through the middle depicting the 2 mm and 4 mm holes.

Section (b) depicts a longitudinal section through the pillars of the lid. These enable a stable upside-down positioning of the lid in which the pipettes will be pointing upwards. The pillars are glued into a 10 mm hole.



## Analog output routing device

**A**

*Principle*

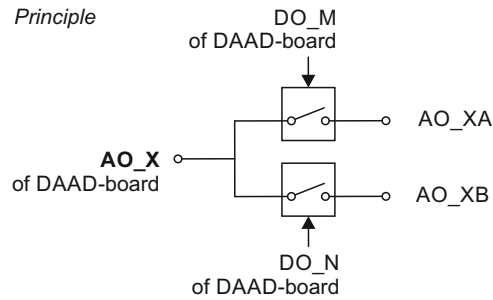

**B**

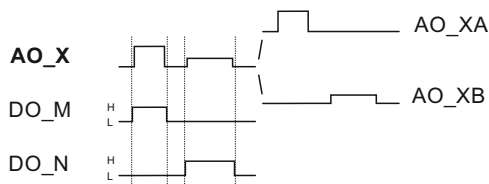

**C**

*Example of Implementation*

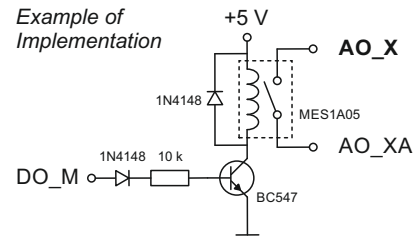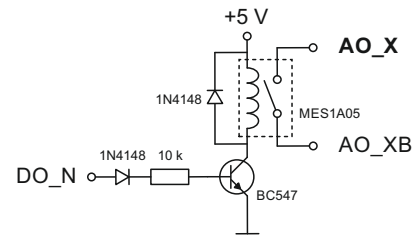

This device is necessary when more headstages are to be used in a multipatch setup than analog output channels are available on the digital-to-analog/analog-to-digital (DAAD-) board.

**A** Principle of a very simple and limited analog-out-switch distributing the analog out signal of the DAAD's analog output channel AO\_X to two channels serving two amplifiers or amplifier channels. The switches are gated by digital output channels of the DAAD-board (DO\_M and DO\_N).

**B** Via AO\_X two different, non-simultaneous, non-overlapping command signals (different time of occurrence, amplitude, duration) are sent to the switch, DO\_M and DO\_N are set high (H) as indicated (note that the digital pulses should start slightly earlier and terminate slightly later than the intended analog signals) and thus gate the respective command to the respective output of the switch (AO\_XA or AO\_XB). This switch is limited in the sense that the connected AO\_XA and AO\_XB will carry an identical (voltage- or current-) command signal (technically in both cases a voltage signal) from the DAAD to the individual amplifier inputs if command signals are to be applied simultaneously.

**C** Example of implementing the principle shown in A. To distribute the analog out command signal of the DAAD-board to two amplifier command input channels, two reed relays (e.g. MES1A05) are used. The power supply can be taken from an USB-port of a computer.
